# Supplementary material for: Drug resistant Mycobacterium tuberculosis in Oman: resistance-conferring mutations and lineage diversity
Source: PeerJ. 2022 Jul 28;10:e13645. doi: 10.7717/peerj.13645 (PMC9339217; doi:10.7717/peerj.13645)
Supplement: Supplemental Information 5 [file peerj-10-13645-s005.xlsx]

## Sheet: Sheet1
														embB											katG																								ahpC
LAB no.	Year	Octal Number	Clade	Lineage	SIT	Nationality	Province	DrugSusceptibility	Streptomycin	Isoniazid	Rifampicin	Ethambutol	Pyrazinamide	ATG306GTG/Met306Val	ATG306ATA/Met306Ile	ATG306ATC/Met306Ile	GCC313GTC/Ala313Val	TAC334TAT/Tyr334Tyr	AGT347CGT/Ser347Arg	CTG355CTA/Leu355Leu	TCG366TCT/Ser366Ser	GAG378GCG/Glu378Ala	GGC406GAC/Gly406Asp	GCG409CCG/Ala409Pro	AGC17GGC/Ser17Gly	GGC19GGT/Gly19Gly	GCC122GCT/Ala122Ala	CTG148TTG/Leu148Leu	GCC168GCT/Ala168Ala	AAG202AAA/Lys202Lys	GGA307GGG/Gly307Gly	ACC308AAC/Thr308Asn	GAC311GAT/Asp311Asp	AGC315ACC/Ser315Thr	GCC379GAC/Ala379Asp	GAA399GAG/Glu399Glu	GGC349GGA/Gly349Gly	CAA352CAG/Gln352Gln	TCG383GCG/Ser383Ala	TTG404CTG/Leu404Leu	CGG463CTG/Arg463Leu	CTA472ATA/Leu472Ile	ACC475ATC/Thr475Ile	GTC503GCC/Val503Ala	CTC526CAC/Leu526His	TTC555TTT/Phe555Phe	TCC650TCT/Ser650Ser	GAC735GCC/Asp735Ala	TGC92TGT/Cys92Cys
388	2018	677777477713771	Orphan	Indo-Oceanic	Orphan	Expatriate	Dhofar	Sensitive	Sensitive	Sensitive	Sensitive	Sensitive	Sensitive	A	G	G	C	C	A	G	G	C	G	G	A	C	C	C	C	G	A	C	C	G	C	A	C	A	T	T	G	C	C	T	T	C	C	A
389	2018	703777740003771	CAS	East-African-Indian	26	Omani	Dhofar	Sensitive	Sensitive	Sensitive	Sensitive	Sensitive	Sensitive	A	G	G	C	C	A	G	G	A	G	G	A	C	C	C	C	G	A	C	C	G	C	A	C	A	T	T	T	C	C	T	T	C	C	A	C
390	2018	703777740003771	CAS	East-African-Indian	26	Expatriate	Dhofar	PZAR	Sensitive	Sensitive	Sensitive	Sensitive	Resistant	A	G	G	C	C	A	G	G	A	G	G	A	C	C	C	C	G	A	C	C	G	C	A	C	A	T	T	T	C	C	T	T	C	C	A	C
441	2018	777077777773771	Orphan	Indo-Oceanic	Orphan	Omani	Muscat	Sensitive	Sensitive	Sensitive	Sensitive	Sensitive	Sensitive	A	G	G	C	C	A	A	G	C	G	G	A	C	C	C	C	G	A	C	C	G	C	A	C	G	T	T	G	C	C	T	T	C	C	A	C
481	2018	777777777760771	T	Euro-American	53	Expatriate	Muscat	INHR	Sensitive	Resistant	Sensitive	Sensitive	Sensitive	A	G	G	C	C	A	G	G	A	G	G	A	C	C	C	C	G	A	C	C	C	C	A	C	A	T	T	G	C	C	T	T	C	C	A	C
503	2018	777777607763771	Manu	Euro-American	1247	Omani	Batinah	Sensitive	Sensitive	Sensitive	Sensitive	Sensitive	Sensitive	A	G	G	C	C	A	G	G	A	G	G	A	C	C	C	C	G	A	C	C	G	C	A	C	A	T	T	T	C	C	T	T	C	C	A	C
504	2018	777777777773771	Manu	Indo-Oceanic	100	Expatriate	Muscat	Sensitive	Sensitive	Sensitive	Sensitive	Sensitive	Sensitive	A	G	G	C	C	A	A	G	C	G	G	A	C	C	C	C	G	A	C	C	G	C	A	C	A	T	T	T	C	C	T	T	C	C	A	C
541	2018	777775757413371	EAI	Indo-Oceanic	1340	Omani	Batinah	SMR	Resistant	Sensitive	Sensitive	Sensitive	Sensitive	A	G	G	C	C	A	G	G	C	G	G	A	C	C	C	C	G	A	C	C	G	C	A	C	A	T	T	T	C	C	T	T	C	C	A
556	2018	777777743760771	Cameroon	Euro-American	61	Expatriate	Muscat	Sensitive	Sensitive	Sensitive	Sensitive	Sensitive	Sensitive	A	G	G	C	C	A	G	G	A	G	G	A	C	C	C	C	G	A	C	C	G	C	A	C	A	T	T	G	C	C	T	T	C	C	A	C
579	2018	773777767763771	Orphan	Euro-American	Orphan	Omani	Muscat	Sensitive	Sensitive	Sensitive	Sensitive	Sensitive	Sensitive	A	G	G	C	C	A	G	G	A	G	G	A	C	C	C	C	G	A	C	C	G	C	A	C	A	T	T	T	C	C	T	T	C	C	A	C
585	2018	676773777777600	BOV	M. bovis	482	Omani	Muscat	PZAR	Sensitive	Sensitive	Sensitive	Sensitive	Resistant																				C	G	C	A	C	A	T	T	G	C	C	T	T	C	C	A	C
602	2018	774777777773771	Orphan	Indo-Oceanic	Orphan	Expatriate	Muscat	PZAR	Sensitive	Sensitive	Sensitive	Sensitive	Resistant	A	G	G	C	C	A	G	G	C	G	G	A	C	C	C	C	G	A	C	C	G	C	A	C	A	T	T	T	C	C	T	T	C	C	A	C
673	2018	400034037413771	Orphan	Indo-Oceanic	Orphan	Omani	Dhofar	Sensitive	Sensitive	Sensitive	Sensitive	Sensitive	Sensitive	A	G	G	C	C	A	G	G	C	G	G	A	C	C	C	C	G	A	C	C	G	C	A	C	A	T	T	T	C	C	T	T	C	C	A	C
688	2018	037637777760771	T	Euro-American	284	Expatriate	Muscat	Sensitive	Sensitive	Sensitive	Sensitive	Sensitive	Sensitive	A	G	G	C	C	A	G	G	A	G	G	A	C	C	C	C	G	A	C	C	G	C	G	C	A	T	T	G	C	C	T	T	C	C	A	C
692	2018	677777477413751	EAI	Indo-Oceanic	287	Expatriate	Muscat	Sensitive	Sensitive	Sensitive	Sensitive	Sensitive	Sensitive	A	G	G	C	C	A	A	G	C	G	G	A	C	C	C	C	G	A	C	C	G	C	A	C	A	T	T	T	C	C	T	T	C	C	A	C
698	2018	777777757413371	EAI	Indo-Oceanic	292	Expatriate	Muscat	Sensitive	Sensitive	Sensitive	Sensitive	Sensitive	Sensitive	A	G	G	C	C	A	G	G	C	G	G	A	C	C	C	C	G	A	C	C	G	C	A	C	A	T	T	T	C	C	T	T	C	C	A	C
742	2018	777757777760771	T	Euro-American	393	Omani	Batinah	INHR	Sensitive	Resistant	Sensitive	Sensitive	Sensitive												A	C	C	C	C	G	A	C	C	C	C	A	C	A	T	T	G	C	C	T	T	C	C	A	C
768	2018	577777777760771	T	Euro-American	334	Expatriate	Dhahira	Sensitive	Sensitive	Sensitive	Sensitive	Sensitive	Sensitive	A	G	G	C	C	A	G	G	A	G	G	A	C	C	C	C	G	A	C	C	G	C	A	C	A	G	T	G	C	C	T	T	C	C	A	C
824	2018	777777777760601	T	Euro-American	244	Omani	Muscat	Sensitive	Sensitive	Sensitive	Sensitive	Sensitive	Sensitive
904	2018	477737777413071	EAI	Indo-Oceanic	3803	Expatriate	Dhahira	PZAR	Sensitive	Sensitive	Sensitive	Sensitive	Resistant	A	G	G	C	C	A	G	G	C	G	G	A	C	C	C	C	G	A	C	C	G	C	A	C	A	T	T	T	C	C	T	T	C	C	A	C
983	2018	777777777760771	T	Euro-American	53	Omani	Muscat	Sensitive	Sensitive	Sensitive	Sensitive	Sensitive	Sensitive	A	G	G	C	C	A	G	G	C	G	G	A	C	C	C	C	G	A	C	C	G	C	A	C	A	T	T	G	C	C	T	T	C	C	A	C
996	2018	777777777760731	T	Euro-American	52	Expatriate	Dakhliyah	Sensitive	Sensitive	Sensitive	Sensitive	Sensitive	Sensitive	A	G	G	C	C	A	G	G	A	G	G	A	C	C	C	C	G	A	C	C	G	C	A	C	A	T	T	G	C	C	T	T	C	C	A
1031	2018	000000007760771	T	Euro-American	4	Expatriate	Muscat	Sensitive	Sensitive	Sensitive	Sensitive	Sensitive	Sensitive	A	G	G	C	C	A	G	G	A	G	G	A	C	C	C	C	G	A	C	C	G	C	A	C	A	T	T	G	C	C	T	T	C	C	A	C
1154	2018	777777777773771	Manu	Indo-Oceanic	100	Expatriate	Muscat	Sensitive	Sensitive	Sensitive	Sensitive	Sensitive	Sensitive	A	G	G	C	C	A	G	G	C	G	G	A	C	C	C	C	G	A	C	C	G	C	A	C	A	T	T	G	C	C	T	T	C	C	A	C
1199	2018	577777757413771	EAI	Indo-Oceanic	882	Expatriate	Muscat	Sensitive	Sensitive	Sensitive	Sensitive	Sensitive	Sensitive	A	G	G	C	C	A	G	G	C	G	G	A	C	C	C	C	G	A	C	C	G	C	A	C	A	T	T	G	C	C	T	T	C	C	A	C
1219	2018	577777777760771	T	Euro-American	334	Expatriate		Sensitive	Sensitive	Sensitive	Sensitive	Sensitive	Sensitive	A	G	G	C	C	A	G	G	A	G	G	A	C	C	C	C	G	A	C	C	G	C	A	C	A	T	T	G	C	C	T	T	C	C	A	C
1420	2018	703777740003771	CAS	East-African-Indian	26	Expatriate	Dhahira	Sensitive	Sensitive	Sensitive	Sensitive	Sensitive	Sensitive												A	C	C	C	C	G	A	C	C	G	C	A	C	A	T	T	T	C	C	T	T	C	C	A
1428	2018	477777777413071	EAI	Indo-Oceanic	11	Expatriate	Dakhliyah	Sensitive	Sensitive	Sensitive	Sensitive	Sensitive	Sensitive	A	G	G	C	C	A	G	G	C	G	G	A	C	C	C	C	G	A	C	C	G	C	A	C	A	T	T	T	C	C	T	T	C	C	A	C
1465	2018	703777740003771	CAS	East-African-Indian	26	Omani	Muscat	Sensitive	Sensitive	Sensitive	Sensitive	Sensitive	Sensitive	A	G	G	C	C	A	G	G	A	G	G	A	C	C	C	C	G	A	C	C	G	C	A	C	A	T	T	T	C	C	T	T	C	C	A	C
1494	2018	477777777413071	EAI	Indo-Oceanic	11	Omani	Batinah	Sensitive	Sensitive	Sensitive	Sensitive	Sensitive	Sensitive	A	G	G	C	C	A	G	G	C	G	G	A	C	C	C	C	G	A	C	C	G	C	A	C	A	T	T	T	C	C	T	T	C	C	A	C
1495	2018	776777702003371	Orphan	Indo-Oceanic	Orphan	Omani	Batinah	SMR	Resistant	Sensitive	Sensitive	Sensitive	Sensitive	A	G	G	C	C	A	G	G	C	G	G	A	C	C	C	C	G	A	C	C	G	C	A	C	A	T	T	T	C	C	T	T	C	C	A	C
1631	2018	000000000003771	Beijing	East-Asian	1	Expatriate	Muscat	MDR	Resistant	Resistant	Resistant	Sensitive	Sensitive	A	G	G	C	C	A	G	G	A	G	G	A	C	C	C	C	G	A	C	C	G	C	A	C	A	T	T	G	C	C	T	T	C	C	A
1711	2018	777777767763771	Orphan	Euro-American	Orphan	Omani	Batinah	Sensitive	Sensitive	Sensitive	Sensitive	Sensitive	Sensitive	A	G	G	C	C	A	G	G	A	G	G	A	C	C	C	C	G	A	C	C	G	C	A	C	A	T	T	G	C	C	T	T	C	C	A	C
1984	2018	003777777760731	Orphan	Euro-American	Orphan	Expatriate	Batinah	Sensitive	Sensitive	Sensitive	Sensitive	Sensitive	Sensitive	A	G	G	C	C	A	G	G	A	G	G	A	C	C	C	C	G	A	C	C	G	C	A	C	A	T	T	G	C	C	T	T	C	C	A	C
1996	2018	777775777700771	Orphan	Euro-American	Orphan	Expatriate	Batinah	PZAR	Sensitive	Sensitive	Sensitive	Sensitive	Resistant	A	G	G	C	C	A	G	G	C	G	G	A	C	C	C	C	G	A	C	C	G	C	A	C	A	T	T	T	C	C	T	T	C	C	A	C
2109	2018	477777661760771	T	Euro-American	2995	Omani	Muscat	Sensitive	Sensitive	Sensitive	Sensitive	Sensitive	Sensitive	A	G	G	C	C	A	G	G	A	G	G	A	C	C	C	C	G	A	C	C	G	C	A	C	A	T	T	G	C	C	T	T	C	C	A	C
2213	2018	777777607560771	LAM	Euro-American	64	Omani	Muscat	Sensitive	Sensitive	Sensitive	Sensitive	Sensitive	Sensitive												A	C	C	C	C	G	A	C	C	G	C	A	C	A	T	T	G	C	C	T	T	C	C	A	C
2257	2018	737001777413731	EAI	Indo-Oceanic	3804	Omani	Batinah	PZAR	Sensitive	Sensitive	Sensitive	Sensitive	Resistant	A	G	G	C	C	A	G	G	C	G	G	A	C	C	C	C	G	A	C	C	G	C	A	C	A	T	T	T	C	C	T	T	C	C	A	C
2299	2018	477777377413771	EAI	Indo-Oceanic	109	Omani	Muscat	Sensitive	Sensitive	Sensitive	Sensitive	Sensitive	Sensitive	A	G	G	C	C	A	G	G	C	G	G	A	C	C	C	C	G	A	C	C	G	C	A	C	A	T	T	T	C	C	T	T	C	C	A	T
2568	2018	400037777413671	EAI	Indo-Oceanic	3828	Omani	Batinah	Sensitive	Sensitive	Sensitive	Sensitive	Sensitive	Sensitive	A	G	G	C	C	A	G	G	C	G	G	A	C	C	C	C	G	A	C	C	G	C	A	C	A	T	T	T	C	C	T	T	C	C	A
3502	2018	703777600000771	CAS	East-African-Indian	2726	Omani	Muscat	Sensitive	Sensitive	Sensitive	Sensitive	Sensitive	Sensitive												A	C	C	C	C	G	A	C	C	G	C	A	C	A	T	T	G	C	C	T	T	C	C	A
2944	2018	777777703763771	Orphan	Euro-American	Orphan	Expatriate		Sensitive	Sensitive	Sensitive	Sensitive	Sensitive	Sensitive												A	C	C	C	C	G	A	C	C	G	C	A	C	A	T	T	G	C	C	T	T	C	C	A	C
3043	2018	777767777760771	T	Euro-American	118	Omani	Batinah	Sensitive	Sensitive	Sensitive	Sensitive	Sensitive	Sensitive																				C	G	C	A	C	A	T	T	G	C	C	T	T	C	C	A
3241	2018	777777757413371	EAI	Indo-Oceanic	292	Expatriate	Dakhliyah	PZAR	Sensitive	Sensitive	Sensitive	Sensitive	Resistant	A	G	G	C	C	A	G	G	C	G	G	A	C	C	C	C	A	A	C	C	G	C	A	C	A	T	T	T	C	C	T	T	C	C	A	C
3330	2018	000000007760771	T	Euro-American	4	Expatriate	Muscat	Sensitive	Sensitive	Sensitive	Sensitive	Sensitive	Sensitive	A	G	G	C	C	A	G	G	A	G	G	A	C	C	C	C	G	A	C	C	G	C	A	C	A	T	T	G	C	C	T	T	C	C	A	C
3338	2018					Expatriate	Batinah	Sensitive	Sensitive	Sensitive	Sensitive	Sensitive	Sensitive	A	G	G	C	C	A	G	G	A	G	G	A	C	C	C	C	G	A	C	C	G	C	A	C	A	T	T	T	C	C	T	T	C	C	A	C
4001	2018	477767777413071	EAI	Indo-Oceanic	298	Omani	Dhahira	PZAR	Sensitive	Sensitive	Sensitive	Sensitive	Resistant	A	G	G	C	C	A	G	G	C	G	G	A	C	T	C	C	G	A	C	C	G	C	A	C	A	T	T	G	C	C	T	T	C	C	A	C
3746	2018	773777667763771	Orphan	Euro-American	Orphan	Omani	Dhofar	Sensitive	Sensitive	Sensitive	Sensitive	Sensitive	Sensitive												A	C	C	C	C		A	C	C	G	C	A	C	A	T	T	T	C	C	T				A
3787	2018	777751667763471	Orphan	Euro-American	Orphan	Expatriate	Dakhliyah	Sensitive	Sensitive	Sensitive	Sensitive	Sensitive	Sensitive	A	G	G	C	C	A	G	G	C	G	G	A	C	C	C	C	G	A	C	C	G	C	A	C	A	T	T	T	C	C	T	T	C	C	A
4276	2018					Expatriate	Muscat	MDR	Resistant	Resistant	Resistant	Resistant	Sensitive
4309	2018	777777777413671	EAI	Indo-Oceanic	256	Omani		Sensitive	Sensitive	Sensitive	Sensitive	Sensitive	Sensitive	A	G	G	C	C	A	G	G	C	G	G	A	C	C	C	C	G	A	C	C	G	C	A	C	A	T	T	T	C	C	T	T	C	C	A
4361	2018	777777704020771	H	Euro-American	283	Expatriate	Muscat	Sensitive	Sensitive	Sensitive	Sensitive	Sensitive	Sensitive	A	G	G	C	C	A	G	G	A	G	G	A	C	C	C	C	G	A	C	C	G	C	A	C	A	T	T	G	C	C	T	T	C	C	A	C
4357	2018	477777477413771	EAI	Indo-Oceanic	413	Expatriate	Batinah	Sensitive	Sensitive	Sensitive	Sensitive	Sensitive	Sensitive	A	G	G	C	C	A	A	G	C	G	G	A	C							C	G	C	A	C	A	T	T	T	C	C	T	T	C	C	A
69	2017	477777777413031	EAI	Indo-Oceanic	355	Expatriate	Batinah	PZAR	Sensitive	Sensitive	Sensitive	Sensitive	Resistant	A	G	G	C	C	A	G	G	C	G	G	A	C	C	C	C	G	A	C	C	G	C	A	C	A	T	T	T	C	C	T	T	C	C	A	C
388	2017	455567677413071	Orphan	Indo-Oceanic	Orphan	Omani	Batinah	PZAR	Sensitive	Sensitive	Sensitive	Sensitive	Resistant	A	G	G	C	C	A	G	G	C	G	G	A	C	C	C	C	G	A	C	C	G	C	A	C	A	T	T	T	C	C	T	T	C	C	A	C
661	2017	777777777412300	Orphan	Indo-Oceanic	orphan	Expatriate	Muscat	PZAR	Sensitive	Sensitive	Sensitive	Sensitive	Resistant	A	G	G	C	C	A	G	G	C	G	G	A	C	C	C	C	G	A	C	C	G	C	A	C	A	T	T	T	C	C	T	T	C	C	A	C
838	2017	477727777403071	Orphan	Indo-Oceanic	Orphan	Omani	Batinah	PZAR	Sensitive	Sensitive	Sensitive	Sensitive	Resistant	A	G	G	C	C	A	G	G	C	G	G	A	C	C	C	C	G	A	C	T	G	C	A	C	A	T	T	T	C	C	T	T	C	C	A	C
1413	2017	400027677413771	Orphan	Indo-Oceanic	Orphan	Omani	Batinah	PZAR	Sensitive	Sensitive	Sensitive	Sensitive	Resistant	A	G	G	C	C	A	G	G	C	G	G	A	C	C	C	C	G	A	C	C	G	C	A	C	A	T	T	T	C	C	T	T	C	C	A	C
1134	2017	777767677413731	Orphan	Indo-Oceanic	Orphan	Omani	Dhofar	PZAR	Sensitive	Sensitive	Sensitive	Sensitive	Resistant	A	G	G	C	C	A	G	G	C	G	G	A	C	C	C	C	G	A	C	C	G	C	A	C	A	T	T	T	C	C	T	T	C	C	A	C
1673	2017	676763677777600	BOV	M. bovis	695	Omani		PZAR	Sensitive	Sensitive	Sensitive	Sensitive	Resistant																				C	G	C	A	C	A	T	T	G	C	C	T	T	C	C	A	C
3155	2017	477777777413031	EAI	Indo-Oceanic	355	Omani	Dhahira	Sensitive	Sensitive	Sensitive	Sensitive	Sensitive	Sensitive	A	G	G	C	C	A	G	G	C	G	G	A	C	T	C	C	G	A	C	C	G	C	A	C	A	T	T	T	C	C	T	T	C	C	A	C
3187	2017	703777740003771	CAS	East-African-Indian	26	Expatriate	Batinah	Sensitive	Sensitive	Sensitive	Sensitive	Sensitive	Sensitive	A	G	G	C	C	A	G	G	A	G	G	A	C	C	C	C	G	A	C	C	G	C	A	C	A	T	T	T	C	C	T	T	C	C	A	C
3204	2017	777000377760771	T	Euro-American	149	Omani	Dhofar	Sensitive	Sensitive	Sensitive	Sensitive	Sensitive	Sensitive	A	G	G	C	C	A	G	G	A	G	G	A	C	T	C	C	G	A	C	C	G	C	A	C	A	T	T	G	C	C	T	T	C	C	A	C
3397	2017	676773777777600	BOV	M. bovis	482	Omani		PZAR	Sensitive	Sensitive	Sensitive	Sensitive	Resistant																				C	G	C	A	C	A	T	T	G	C	C	T	T	C	C	A	C
4059	2017					Omani	Sharqiyah	Sensitive	Sensitive	Sensitive	Sensitive	Sensitive	Sensitive	A	G	G	C	C	A	G	G	C	G	G	A	C	C	C	C	G	A	C	C	G	C	A	C	A	T	T	T	C	C	T	T	C	C	A	T
4288	2017					Expatriate	Batinah	Sensitive	Sensitive	Sensitive	Sensitive	Sensitive	Sensitive	A	G	G	C	C	A	G	G	A	G	G	A	C	C	C	C	G	A	C	C	G	C	A	C	A	T	T	T	C	C	T	T	C	C	A	C
5177	2017	737001777413731	EAI	Indo-Oceanic	3804	Omani	Batinah	PZAR	Sensitive	Sensitive	Sensitive	Sensitive	Resistant	A	G	G	C	C	A	G	G	C	G	G	A	C	C	C	C	G	A	C	C	G	C	A	C	A	T	T	T	C	C	T	T	C	C	A	C
5582	2017	677777477413771	EAI	Indo-Oceanic	19	Omani		Sensitive	Sensitive	Sensitive	Sensitive	Sensitive	Sensitive	A	G	G	C	C	A	G	G	C	G	G	A	C	C	C	C	G	A	C	C	G	C	A	C	A	T	T	T	C	C	T	T	C	C	A	C
95	2016	703777740003771	CAS	East-African-Indian	26	Omani		Sensitive	Sensitive	Sensitive	Sensitive	Sensitive	Sensitive	A	G	G	C	C	A	G	T	A	G	G	A	C	C	C	C	G	A	C	C	G	C	A	C	A	T	T	G	C	C	T	T	C	C	A
1570	2016	777677743760771	Orphan	Euro-American	Orphan	Omani		Sensitive	Sensitive	Sensitive	Sensitive	Sensitive	Sensitive	A	G	G	C	C	A	G	G	A	G	G	A	C	C	C	C	G	A	C	C	G	C	A	C	A	T	T	G	C	C	T	T	C	C	A	C
5573	2016	477777777413031	EAI	Indo-Oceanic	355	Expatriate	Batinah	PZAR	Sensitive	Sensitive	Sensitive	Sensitive	Resistant	A	G	G	C	C	A	G	G	C	G	G	A	C	T	C	C	G	A	C	C	G	C	A	C	A	T	T	G	C	C	T	T	C	C	A	C
483	2015	676773777777400	Orphan	M. bovis	Orphan	Omani	Dakhliyah	PZAR	Sensitive	Sensitive	Sensitive	Sensitive	Resistant																				C	G	C	A	C	A	T	T	G	C	C	T	T	C	C	A	C
643	2015	676773777777600	BOV	M. bovis	482	Omani	Muscat	PZAR	Sensitive	Sensitive	Sensitive	Sensitive	Resistant																				C	G	C	A	C	A	T	T	G	C	C	T	T	C	C	A	C
681	2015	676773777777600	BOV	M. bovis	482	Omani	Batinah	PZAR	Sensitive	Sensitive	Sensitive	Sensitive	Resistant																				C	G	C	A	C	A	T	T	G	C	C	T	T	C	C	A	C
1237	2015	400037777413771	EAI	Indo-Oceanic	8	Omani	Batinah	PZAR	Sensitive	Sensitive	Sensitive	Sensitive	Resistant	A	G	G	C	C	A	G	G	C	G	G	A	C	C	C	C	G	A	C	C	G	C	A	C	A	T	T	T	C	C	T	T	C	C	A	C
3010	2018	760000377413731	Orphan	Indo-Oceanic	Orphan	Expatriate	Muscat	Sensitive	Sensitive	Sensitive	Sensitive	Sensitive	Sensitive
3451	2018	777767606060771	LAM	Euro-American	2268	Expatriate		Sensitive	Sensitive	Sensitive	Sensitive	Sensitive	Sensitive	A	G	G	C	C	A	G	G	A	G	G
16	2017	703777740003771	CAS	East-African-Indian	26	Omani	Muscat	Sensitive	Sensitive	Sensitive	Sensitive	Sensitive	Sensitive	A	G	G	C	C	A	G	G	A	G	G
20	2017	000000000003771	Beijing	East-Asian	1	Omani	Muscat	Sensitive	Sensitive	Sensitive	Sensitive	Sensitive	Sensitive	A	G	G	C	C	A	G	G	A	G	G
21	2017	477777777413771	EAI	Indo-Oceanic	126	Expatriate	Muscat	Sensitive	Sensitive	Sensitive	Sensitive	Sensitive	Sensitive	A	G	G	C	C	A	G	G	C	G	G
28	2017	703741000000760	CAS	East-African-Indian	3161	Expatriate	Muscat	Sensitive	Sensitive	Sensitive	Sensitive	Sensitive	Sensitive	A	G	G	C	C	A	G	G	A	G	G
40	2017	776777702003371	Orphan	Indo-Oceanic	Orphan	Omani	Muscat	SMR	Resistant	Sensitive	Sensitive	Sensitive	Sensitive	A	G	G	C	C	A	G	G	C	G	G	A	C	C	C	C	G	A	C	C	G	C	A	C	A	T	T	T	C	C	T	T	C	C	A
45	2017	703775000000771	Orphan	East-African-Indian	Orphan	Omani	Muscat	Sensitive	Sensitive	Sensitive	Sensitive	Sensitive	Sensitive	A	G	G	C	C	A	G	G	A	G	G
68	2017	555567677740671	Orphan	Euro-American	Orphan	Omani	Batinah	Sensitive	Sensitive	Sensitive	Sensitive	Sensitive	Sensitive	A	G	G	C	C	A	G	G	A	G	G
102	2017	777767657413371	Orphan	Indo-Oceanic	Orphan	Omani	Muscat	#NULL!					#NULL!	A	G	G	C	C	A	G	G	C	G	G	A	C	C	C	C	G	A	C	C	G	C	A	C	A	T	T	T	C	C	T	T	C	C	A
108	2017					Expatriate	Buraimi	Sensitive	Sensitive	Sensitive	Sensitive	Sensitive	Sensitive	A	G	G	C	C	A	G	G	C	G	G
240	2017	400037777413771	EAI	Indo-Oceanic	8	Omani		Sensitive	Sensitive	Sensitive	Sensitive	Sensitive	Sensitive	A	G	G	C	C	A	G	G	C	G	G
282	2017	703777740003771	CAS	East-African-Indian	26	Omani	Dhofar	Sensitive	Sensitive	Sensitive	Sensitive	Sensitive	Sensitive	A	G	G	C	C	A	G	G	A	G	G
283	2017	703777740003171	CAS	East-African-Indian	25	Expatriate	Dhofar	Sensitive	Sensitive	Sensitive	Sensitive	Sensitive	Sensitive	A	G	G	C	C	A	G	G	A	G	G
1475	2017	777777777413731	EAI	Indo-Oceanic	48	Expatriate	Buraimi	INHR	Sensitive	Resistant	Sensitive	Sensitive	Sensitive	A	G	G	C	C	A	G	G	C	G	G	A	C	C	C	C	G	A	C	C	G	C	A	C	A	T	C	T	C	C	T	T	C	C	A	C
2290	2017	703777740003771	CAS	East-African-Indian	26	Expatriate	Buraimi	Sensitive	Sensitive	Sensitive	Sensitive	Sensitive	Sensitive												A	C	C	C	C	G	A	C	C	G	C	A	C	A	T	T	G	C	C	T	T	C	C	A	C
2720	2017	703777740003171	CAS	East-African-Indian	25	Omani	Dhahira	Sensitive	Sensitive	Sensitive	Sensitive	Sensitive	Sensitive	A	G	G	C	C	A	G	G	A	G	G	A	C	C	C	C	G	A	C	C	G	C	A	C	A	T	T	T	C	C	T	T	C	C	A	C
2360	2017	703777740003171	CAS	East-African-Indian	25	Expatriate	Muscat	Sensitive	Sensitive	Sensitive	Sensitive	Sensitive	Sensitive	A	G	G	C	C	A	G	G	A	G	G	A	C	C	C	C	G	A	C	C	G	C	A	C	A	T	T	T	C	C	T	T	C	C	A	C
2542	2017	703777400001771	CAS	East-African-Indian	22	Omani	Muscat	PZAR	Sensitive	Sensitive	Sensitive	Sensitive	Resistant	A	G	G	C	C	A	G	G	A	G	G	A	C	C	C	C	G	A	C	C	G	C	A	C	A	T	T	G	C	C	T	T	C	C	A	C
2563	2017	400037777413771	EAI	Indo-Oceanic	8	Omani	Dakhliyah	Sensitive	Sensitive	Sensitive	Sensitive	Sensitive	Sensitive	A	G	G	C	C	A	G	G	C	G	G	A	C	C	C	C	G	A	C	C	G	C	A	C	A	T	T	G	C	C	T	T	C	C	A	C
3682	2017	777767777413700	Orphan	Indo-Oceanic	Orphan	Expatriate	Sharqiyah	#NULL!		Sensitive	Sensitive		#NULL!												A	C	C	C	C	G	A	C	C	G	C	A	C	A	T	T	T	C	C	T	T	C	C	A
2731	2017	777737777760771	T	Euro-American	37	Omani	Sharqiyah	Sensitive	Sensitive	Sensitive	Sensitive	Sensitive	Sensitive	A	G	G	T	C	A	G	G	A	G	G	A	C	C	C	C	G	A	C	C	G	C	A	C	A	T	T	G	C	C	T	T	C	C	A	C
2756	2017	703761000000331	CAS	East-African-Indian	2682	Expatriate	Sharqiyah	INHR	Sensitive	Resistant	Sensitive	Sensitive	Sensitive	A	G	G	C	C	A	G	G	A	G	G	A	C	C	C	C	G	A	C	C	G	C	A	C	A	T	T	T	C	C	T	A	C	C	A	C
2779	2017	703777740003171	CAS	East-African-Indian	25	Omani		Sensitive	Sensitive	Sensitive	Sensitive	Sensitive	Sensitive	A	G	G	C	C	A	G	G	A	G	G	A	C	C	C	C	G	A	C	C	G	C	A	C	A	T	T	T	C	C	T	T	C	C	A	C
2893	2017	703377400001771	CAS	East-African-Indian	21	Expatriate	Dhofar	Sensitive	Sensitive	Sensitive	Sensitive	Sensitive	Sensitive	A	G	G	C	C	A	G	G	A	G	G	A	C	C	C	C	G	A	C	C	G	C	A	C	A	T	T	T	C	C	T	T	C	C	A	C
2926	2017	000000000003771	Beijing	East-Asian	1	Expatriate	Batinah	Sensitive	Sensitive	Sensitive	Sensitive	Sensitive	Sensitive	A	G	G	C	C	A	G	G	A	G	G	A	C	C	C	C	G	A	C	C	G	C	A	C	A	T	T	T	C	C	T	T	C	C	A	C
2980	2017	703777740003171	CAS	East-African-Indian	25	Omani		Sensitive	Sensitive	Sensitive	Sensitive	Sensitive	Sensitive												A	C	C	C	C	G	A	C	C	G	C	A	C	A	T	T	T	C	C	T	T	C	C	A	C
3012	2017	777737777760771	T	Euro-American	37	Omani		Sensitive	Sensitive	Sensitive	Sensitive	Sensitive	Sensitive												A	C	C	C	C	G	A	C	C	G	C	A	C	A	T	T	G	C	C	T	T	C	C	A	C
3054	2017	777617777760730	Orphan	Euro-American	Orphan	Expatriate	Batinah	Sensitive	Sensitive	Sensitive	Sensitive	Sensitive	Sensitive												A	C	C	C	C	G	A	C	C	G	C	A	C	A	T	T	G	C	C	T	T	C	C	A	C
3136	2017	677777477413771	EAI	Indo-Oceanic	19	Expatriate	Dakhliyah	Sensitive	Sensitive	Sensitive	Sensitive	Sensitive	Sensitive	A	G	G	C	C	A	A	G	C	G	G
3153	2017	000000000003771	Beijing	East-Asian	1	Omani	Muscat	Sensitive	Sensitive	Sensitive	Sensitive	Sensitive	Sensitive	A	G	G	C	C	A	G	G	A	G	G	A	C	C	C	C	G	A	C	C	G	C	A	C	A	T	T	T	C	C	T	T	C	C	A	C
3217	2017	777617777760730	Orphan	Euro-American	Orphan	Expatriate	Batinah	Sensitive	Sensitive	Sensitive	Sensitive	Sensitive	Sensitive	A	G	G	C	C	A	G	G	A	G	G	A	C	C	C	C	G	A	C	C	G	C	A	C	A	T	T	G	C	C	T	T	C	C	A	C
3285	2017	000000000003771	Beijing	East-Asian	1	Expatriate	Muscat	Sensitive	Sensitive	Sensitive	Sensitive	Sensitive	Sensitive	A	G	G	C	C	A	G	G	A	G	G
3382	2017	703767400001771	CAS	East-African-Indian	3497	Omani	Dakhliyah	Sensitive	Sensitive	Sensitive	Sensitive	Sensitive	Sensitive	A	G	G	C	C	A	G	G	A	G	G	A	C	C	C	C	G	A	C	C	G	C	A	C	A	T	T	G	C	C	T	T	C	C	A	C
3457	2017	703767640003771	CAS	East-African-Indian	3792	Expatriate	Batinah	SMR	Resistant	Sensitive	Sensitive	Sensitive	Sensitive	A	G	G	C	C	A	G	G	A	G	G	A	C	C	C	C	G	A	C	C	G	C	A	C	A	T	T	T	C	C	T	T	C	C	A	C
3469	2017	477767677413071	Orphan	Indo-Oceanic	Orphan	Expatriate	Muscat	Sensitive	Sensitive	Sensitive	Sensitive	Sensitive	Sensitive	A	G	G	C	C	A	G	G	A	G	G	A	C	C	C	C	G	A	C	C	G	C	A	C	A	T	T	T	C	C	T	T	C	C	A	C
3494	2017	577767657413771	Orphan	Indo-Oceanic	Orphan	Expatriate	Muscat	SMR	Resistant	Sensitive	Sensitive	Sensitive	Sensitive												A	C	C	C	C	G	A	C	C	G	C	A	C	A	T	T	T	C	C	T	T	C	C	A
3524	2017	777741002403371	Orphan	Indo-Oceanic	Orphan	Expatriate	Dakhliyah	Sensitive	Sensitive	Sensitive	Sensitive	Sensitive	Sensitive
3558	2017	777767603413700	Orphan	Indo-Oceanic	Orphan	Omani	Muscat	Sensitive	Sensitive	Sensitive	Sensitive	Sensitive	Sensitive	A	G	G	C	C	A	G	G	A	G	G
3577	2017	474367677413771	Orphan	Indo-Oceanic	Orphan	Expatriate	Sharqiyah	SMR	Resistant	Sensitive	Sensitive	Sensitive	Sensitive	A	G	G	C	C	A	G	G	C	G	G	A	C	C	C	C	G	A	C	C	G	C	A	C	A	T	T	T	C	C	T	T	C	C	A	C
3578	2017	637765677760730	Orphan	Euro-American	Orphan	Omani	Batinah	PZAR	Sensitive	Sensitive	Sensitive	Sensitive	Resistant	A	G	G	C	C	A	G	G	C	G	G	A	C	C	C	C	G	A	C	C	G	C	A	C	A	T	T	T	C	C	T	T	C	C	A
3579	2017	703767640003771	CAS	East-African-Indian	3792	Expatriate	Batinah	Sensitive	Sensitive	Sensitive	Sensitive	Sensitive	Sensitive	A	G	G	C	C	A	G	G	A	G	G
3666	2017	677767477413001	Orphan	Indo-Oceanic	Orphan	Omani	Muscat	Sensitive	Sensitive	Sensitive	Sensitive	Sensitive	Sensitive	A	G	G	C	C	A	G	G	A	G	G	A	C	C	C	C	G	A	C	C	G	C	A	C	A	T	T	T	C	C	T	T	C	C	A	C
3691	2017	577767757413771	Orphan	Indo-Oceanic	Orphan	Expatriate	Muscat	Sensitive	Sensitive	Sensitive	Sensitive	Sensitive	Sensitive												A	C	C	C	C	G	A	C	C	G	C	A	C	A	T	T	T	C	C	T	T	C	C	A	C
3719	2017	000000000003771	Beijing	East-Asian	1	Expatriate	Batinah	Sensitive	Sensitive	Sensitive	Sensitive	Sensitive	Sensitive	A	G	G	C	C	A	G	G	C	G	G	A	C	C	C	C	G	A	C	C	G	C	A	C	A	T	T	T	C	C	T	T	C	C	A	C
3769	2017	777777404760771	Turkey	Euro-American	41	Expatriate	Dhofar	Sensitive	Sensitive	Sensitive	Sensitive	Sensitive	Sensitive	A	G	G	C	C	A	G	G	A	G	G	A	C	C	C	C	G	A	C	C	G	C	A	C	A	T	T	T	C	C	T	T	C	C	A	C
389	2016	400037777413771	EAI	Indo-Oceanic	8	Expatriate	Dhofar	Sensitive	Sensitive	Sensitive	Sensitive	Sensitive	Sensitive	A	G	G	C	C	A	G	G	C	G	G
502	2016	737777777760731	T	Euro-American	848	Expatriate	Dakhliyah	MDR	Resistant	Resistant	Resistant	Sensitive	Sensitive	A	G	G	C	C	A	G	G	A	G	G	A	C		C	C		A	C	C	C	C	A	C	A	T	T	G	C	C	T	T	C	C	A	C
555	2016	777767777760731	Orphan	Indo-Oceanic	Orphan	Omani	Muscat	Sensitive	Sensitive	Sensitive	Sensitive	Sensitive	Sensitive	A	G	G	C	C	A	G	G	C	G	G
613	2016	477777777413771	EAI	Indo-Oceanic	126	Expatriate		Sensitive	Sensitive	Sensitive	Sensitive	Sensitive	Sensitive	A	G	G	C	C	A	G	G	C	G	G
704	2016	737001777413731	EAI	Indo-Oceanic	3804	Omani	Sharqiyah	Sensitive	Sensitive	Sensitive	Sensitive	Sensitive	Sensitive	A	G	G	C	C	A	G	G	C	G	G
830	2016	703777740003771	CAS	East-African-Indian	26	Omani	Sharqiyah	Sensitive	Sensitive	Sensitive	Sensitive	Sensitive	Sensitive	A	G	G	C	C	A	G	G	A	G	G
877	2016	477477763003771	Orphan	Indo-Oceanic	Orphan	Expatriate	Wousta	Sensitive	Sensitive	Sensitive	Sensitive	Sensitive	Sensitive	A	G	G	C	C	A	G	G	C	G	G
982	2016	700000740003171	Orphan	East-African-Indian	Orphan	Omani		Sensitive	Sensitive	Sensitive	Sensitive	Sensitive	Sensitive	A	G	G	C	C	A	G	G	A	G	G
1216	2016	703777740001771	CAS	East-African-Indian	203	Expatriate	Buraimi	PolyR	Resistant	Resistant	Sensitive	Sensitive	Sensitive	A	G	G	C	C	A	G	G	A	G	G	A	C	C	C	C	G	A	C	C	C	C	A	C	A	T	T	T	C	C	T	T	C	C	A	C
1314	2016	000000000003771	Beijing	East-Asian	1	Omani	Muscat	PolyR	Resistant	Resistant	Sensitive	Sensitive	Sensitive	A	G	G	C	C	A	G	G	A	G	G	A	C	C	C	C	G	A	C	C	C	C	A	C	A	T	T	T	C	C	T	T	C	C	A	C
1336	2016	703767740003771	CAS	East-African-Indian	141	Expatriate	Dhahira	Sensitive	Sensitive	Sensitive	Sensitive	Sensitive	Sensitive	A	G	G	C	C	A	G	G	A	G	G
1424	2016	477777777413071	EAI	Indo-Oceanic	11	Omani	Batinah	PolyR	Sensitive	Resistant	Sensitive	Sensitive	Resistant	A	G	G	C	C	A	G	G	C	G	G	A	C	C	C	C	G	A	C	C	G	C	A	C	A	T	T	T	C	C	T	T	C	C	A
1467	2016	777677777160771	Orphan	Euro-American	Orphan	Expatriate	Dhahira	Sensitive	Sensitive	Sensitive	Sensitive	Sensitive	Sensitive	A	G	G	C	C	A	G	G	A	G	G
1487	2016	777677607760771	LAM	Euro-American	770	Expatriate	Sharqiyah	Sensitive	Sensitive	Sensitive	Sensitive	Sensitive	Sensitive	A	G	G	C	C	A	G	G	A	G	G
1612	2016	703677740000771	Orphan	East-African-Indian	Orphan	Expatriate	Sharqiyah	SMR	Resistant	Sensitive	Sensitive	Sensitive	Sensitive	A	G	G	C	C	A	G	G	A	G	G	A	C	C	C	C	G	A	C	C	G	C	A	C	A	T	T	T	C	C	T	T	C	C	A
3281	2016	003775000003771	Orphan	East-African-Indian	Orphan	Expatriate		PolyR	Resistant	Resistant	Sensitive	Sensitive	Sensitive	A	G	G	C	C	A	G	G	A	G	G	A	C	C	C	C	G	A	C	C	C	C	A	C	A	T	T	T	C	C	T	T	C	C	A	C
4208	2016	777000377760771	T	Euro-American	149	Omani	Batinah	MDR	Resistant	Resistant	Resistant	Resistant	Resistant	A	G	G	C	C	A	G	G	A	G	G	A	C		C	C		A	C	C	C	C	A	C	A	T	T	G	C	C	T	T	C	C	A
205	2015	703367400001771	CAS	East-African-Indian	1675	Expatriate	Dakhliyah	Sensitive	Sensitive	Sensitive	Sensitive	Sensitive	Sensitive												A	C	C	C	C	G	A	C	C	G	C	A	C	A	T	T	T	C	C	T	T	C	C	A	C
342	2015	477767777720771	Orphan	Euro-American	Orphan	Expatriate	Muscat	Sensitive	Sensitive	Sensitive	Sensitive	Sensitive	Sensitive	A	G	G	C	C	A	G	G	A	G	G
638	2015	703741000000331	Orphan	East-African-Indian	Orphan	Expatriate	Dhofar	INHR	Sensitive	Resistant	Sensitive	Sensitive	Sensitive	A	G	G	C	C	A	G	G	A	G	G	A	C	C	C	C	G	A	C	C	C	C	A	C	A	T	T	T	C	C	T	T	C	C	A	C
876	2015	703777740001671	Orphan	East-African-Indian	Orphan	Expatriate	Muscat	PolyR	Resistant	Resistant	Sensitive	Sensitive	Sensitive	A	G	G	C	C	A	G	G	A	G	G	A	C	C	C	C	G	A	C	C	C	C	A	C	A	T	T	T	C	C	T	T	C	C	A	C
1400	2015	700367740001771	Orphan	East-African-Indian	Orphan	Expatriate	Muscat	INHR	Sensitive	Resistant	Sensitive	Sensitive	Sensitive	A	G	C	C	C	A	G	G	A	A	G	A	C	C	C	C	G	A	C	C	C	C	A	C	A	T	T	T	C	C	T	T	C	C	A	C
1947	2015	777777777413700	EAI	Indo-Oceanic	138	Expatriate	Dhofar	PZAR	Sensitive	Sensitive	Sensitive	Sensitive	Resistant	A	G	G	C	C	A	G	G	C	G	G	A	C	C	C	C	G	A	C	C	G	C	A	C	A	T	T	T	C	C	T	T	C	C	A
1564	2015	777777607560771	LAM	Euro-American	64	Omani	Batinah	INHR	Sensitive	Resistant	Sensitive	Sensitive	Sensitive	A	G	G	C	C	A	G	G	A	G	G	A	C	C	C	C	G	A	C	C	G	A	A	C	A	T	T	G	C	C	T	T	C	C	C	C
1912	2015	576177742003771	Orphan	Indo-Oceanic	Orphan	Expatriate	Muscat	INHR	Sensitive	Resistant	Sensitive	Sensitive	Sensitive	A	G	G	C	C	A	G	G	C	G	G	A	C	C	C	C	G	A	C	C	C	C	A	C	A	T	T	T	C	C	T	T	C	C	A	C
1921	2015					Omani	Dhahira	MDR	Sensitive	Resistant	Resistant	Sensitive	Sensitive	A	G	G	C	C	A	G	G	A	G	G	A	C	C	C	C	G	A	C	C	G	C	A	C	A	T	T	T	C	C	T	T	C	C	A
2186	2015	777767377760731	Orphan	Euro-American	Orphan	Expatriate	Muscat	Sensitive	Sensitive	Sensitive	Sensitive	Sensitive	Sensitive	A	G	G	C	C	A	G	G	A	G	G
2486	2015	777777702003371	EAI	Indo-Oceanic	2152	Expatriate	Muscat	Sensitive	Sensitive	Sensitive	Sensitive	Sensitive	Sensitive	A	G	G	C	C	A	G	G	C	G	G
3117	2015	777777607760771	LAM	Euro-American	42	Expatriate	Muscat	Sensitive	Sensitive	Sensitive	Sensitive	Sensitive	Sensitive	A	G	G	C	C	A	G	G	A	G	G
3402	2015	703777740003171	CAS	East-African-Indian	25	Omani	Muscat	Sensitive	Sensitive	Sensitive	Sensitive	Sensitive	Sensitive	A	G	G	C	C	A	G	G	A	G	G
4526	2015	777777757413771	EAI	Indo-Oceanic	591	Expatriate	Batinah	INHR	Sensitive	Resistant	Sensitive	Sensitive	Sensitive	A	G	G	C	C	A	G	G	C	G	G	A	C	C	C	C	G	A	C	C	G	C	A	C	A	T	T	T	C	C	T	T	C	T	A	C
4859	2015	703777740003771	CAS	East-African-Indian	26	Omani	Dhofar	INHR	Sensitive	Resistant	Sensitive	Sensitive	Sensitive	A	G	G	C	C	A	G	G	A	G	G	A	C	C	C	C	G	A	C	C	G	C	A	C	A	T	T	T	C	C	T	T	C	C	A	C
5783	2015	700076777760771	X	Euro-American	92	Expatriate	Dakhliyah	MDR	Resistant	Resistant	Resistant	Sensitive	Resistant	A	A	G	C	C	A	G	G	A	G	G	A	C	C	C	C	G	A	C	C	C	C	A	C	A	T	T	G	C	C	T	T	C	C	A	C
96	2014	000000000003771	Beijing	East-Asian	1	Omani	Dhofar	pre-XDR	-	-	-	-	Resistant	A	G	G	C	C	A	G	G	A	G	G									C	G	C	A	C	A	T	T	G	C	C	T	T	C	C	A
1043	2014	777777757413371	EAI	Indo-Oceanic	292	Expatriate	Muscat	INHR	Sensitive	Resistant	Sensitive	Sensitive	#NULL!	A	G	G	C	C	A	G	G	C	G	G	A	C	C	C	C	G	A	C	C	G	C	A	C	A	T	T	G	C	C	T	T	C	C	A	C
3230	2014	703727640003771	Orphan	East-African-Indian	Orphan	Expatriate	Batinah	Sensitive	Sensitive	Sensitive	Sensitive	Sensitive	Sensitive	A	G	G	C	C	A	G	G	A	G	G	A	C	C	C	C	G	A	C	C	G	C	A	C	A	T	T	T	C	C	T	T	C	C	A	C
3779	2014					Expatriate	Muscat	Sensitive	Sensitive	Sensitive	Sensitive	Sensitive	Sensitive	A	G	G	C	C	A	G	G	A	G	G	A	C	C	C	C	G	A	C	C	G	C	A	C	A	T	T	T	C	C	T	T	C	C	A	C
3849	2014	777577777003731	EAI	Indo-Oceanic	72	Omani		PZAR	Sensitive	Sensitive	Sensitive	Sensitive	Resistant	A	G	G	C	C	A	G	G	C	G	G	A	C	C	C	C	G	A	C	C	G	C	A	C	A	T	T	T	C	C	C	T	C	C	A
3933	2014	703777740003771	CAS	East-African-Indian	26	Expatriate	Dakhliyah	PolyR	Resistant	Resistant	Sensitive	Sensitive	Sensitive	A	G	G	C	C	A	G	G	A	G	G	A	C	C	C	C	G	A	C	C	G	C	A	C	A	T	T	G	C	C	T	T	C	C	A	C
4005	2014	777577777003731	EAI	Indo-Oceanic	72	Omani	Batinah	PZAR	Sensitive	Sensitive	Sensitive	Sensitive	Resistant	A	G	G	C	C	A	G	G	C	G	G	A	C	C	C	C	G	A	C	C	G	C	A	C	A	T	T	T	C	C	C	T	C	C	A
4087	2014	477777077411171	Orphan	Indo-Oceanic	Orphan	Expatriate	Dakhliyah	INHR	Sensitive	Resistant	Sensitive	Sensitive	Sensitive	A	G	G	C	C	A	G	G	C	G	G	A	C	C	C	C	G	A	C	C	G	C	A	C	A	T	T	G	C	C	T	T	C	C	A	C
4392	2014	703767740003771	CAS	East-African-Indian	141	Expatriate	Muscat	INHR	Sensitive	Resistant	Sensitive	Sensitive	Sensitive	A	G	G	C	C	A	G	G	A	G	G	A	C	C	C	C	G	A	C	C	G	C	A	C	A	T	T	G	C	C	T	T	C	C	A	C
4246	2014	777767777760601	T	Euro-American	1754	Expatriate	Muscat	MDR	Sensitive	Resistant	Resistant	Sensitive	Sensitive	A	G	G	C	C	A	G	G	A	G	G	A	C		C	C		A	C	C	C	C	A	C	A	T	T	G	C	C	T	T	C	C	A	C
4619	2014	777757777760771	T	Euro-American	393	Expatriate	Batinah	INHR	Sensitive	Resistant	Sensitive	Sensitive	Sensitive	A	G	G	C	C	A	G	G	A	G	G	A	C	C	C	C	G	A	C	C	G	C	A	C	A	T	T	G	C	C	T	T	C	C	A
4708	2014	477777777413071	EAI	Indo-Oceanic	11	Expatriate	Batinah	PZAR	Sensitive	Sensitive	Sensitive	Sensitive	Resistant	A	G	G	C	C	A	G	G	C	G	G	A	C	C	C	C		A	C	C	G	C	A	C	A	T	T	T	C	C	T				A
6491	2014	700367740003771	Orphan	East-African-Indian	Orphan	Expatriate	Muscat	Sensitive	Sensitive	Sensitive	Sensitive	Sensitive	Sensitive	A	G	G	C	C	A	G	G	C	G	G	A	C	C	C	C	G	A	C	C	G	C	A	C	A	T	T	T	C	C	T	T	C	C	A	C
3157	2018	777767607760771	LAM	Euro-American	150	Expatriate	Batinah	INHR	Sensitive	Resistant	Sensitive	Sensitive	Sensitive												A	C	C	C	C	G	A	C	C	C															C
3776	2018	661477467413771	Orphan	Indo-Oceanic	Orphan	Expatriate	Buraimi	INHR	Sensitive	Resistant	Sensitive	Sensitive	Sensitive	A	G	G	C	C	A	A	G	C	G	G	A	C	C	C	C	G	A	C	C	G	C	A	C	A	T	T	T	C	C	T	T	C	C	A	C
3334	2018	675777467413771	Orphan	Indo-Oceanic	Orphan	Expatriate	Muscat	INHR	Sensitive	Resistant	Sensitive	Sensitive	Sensitive	A	G	G	C	C	A	A	G	A	G	G	A	C		C	C		A	C	C	G	C	A	C	A	T	T	T	C	C	T	T	C	C	A	C
3540	2018	677767477413771	EAI	Indo-Oceanic	1490	Expatriate	Muscat	PZAR	Sensitive	Sensitive	Sensitive	Sensitive	Resistant																				C	G	C	A	C	A	T	T	G	C	C	T	T	C	C	A	C
3567	2018	400037777413671	EAI	Indo-Oceanic	3839	Omani	Muscat	PZAR	Sensitive	Sensitive	Sensitive	Sensitive	Resistant	A	G	G	C	C	A	G	G	C	G	G	A	C	C	C	C	G	A	C	C	G	C	A	C	A	T	T	T	C	C	T	T	C	C	A	C
3602	2018	777777777413700	EAI	Indo-Oceanic	138	Expatriate	Muscat	PZAR	Sensitive	Sensitive	Sensitive	Sensitive	Resistant	A	G	G	C	C	A	G	G	C	G	G	A	C	C	C	C	G	A	C	C	G	C	A	C	A	T	T	T	C	C	T	T	C	C	A	C
3717	2018	631015466013061	Orphan	Indo-Oceanic	Orphan	Expatriate	Muscat	PZAR	Sensitive	Sensitive	Sensitive	Sensitive	Resistant	A	G	G	C	C	A	A	G	C	G	G	A	C	C	C	C	G	A	C	C	G
3732	2018	700377740003771	CAS	East-African-Indian	288	Expatriate	Muscat	MDR	Sensitive	Resistant	Resistant	Resistant	Sensitive	A	G	G	C	C	A	G	G	A	G	G	A	C	C	C	C	G	A	C	C	C	C	A	C	A	T	T	T	C	C	T	T	C	C	A	C
3747	2018	000000000003771	Beijing	East-Asian	1	Expatriate	Dhofar	Sensitive	Sensitive	Sensitive	Sensitive	Sensitive	Sensitive	A	G	G	C	C	A	G	G	A	G	G	A	C	C	C	C	G	A	C	C	G	C	A	C	A	T	T	T	C	C	T	T	C	C	A	C
3748	2018	703767740003171	CAS	East-African-Indian	309	Expatriate	Dhofar	Sensitive	Sensitive	Sensitive	Sensitive	Sensitive	Sensitive	A	G	G	C	C	A	G	G	A	G	G	A	C	C	C	C	G	A	C	C	G	C	A	C	A	T	T	T	C	C	T	T	C	C	A	C
3850	2018	703767740003771	CAS	East-African-Indian	141	Expatriate	Muscat	Sensitive	Sensitive	Sensitive	Sensitive	Sensitive	Sensitive	A	G	G	C	C	A	G	G	A	G	G	A	C	C	C	C	G	A	C	C	G	C	A	C	A	T	T	T	C	C	T	T	C	C	A	C
3918	2018	777767777760771	T	Euro-American	118	Expatriate	Muscat	Sensitive	Sensitive	Sensitive	Sensitive	Sensitive	Sensitive	A	G	G	C	C	A	G	G	A	G	G	A	C	C	C	C	G	A	C	C	G	C	A	C	A	T	T	G	C	C	T	T	C	C	A	C
3966	2018	776367777760771	S	Euro-American	831	Expatriate	Dhofar	Sensitive	Sensitive	Sensitive	Sensitive	Sensitive	Sensitive												A	C	C	C	C	G	A	C	C	G	C	A	C	A	T	T	G	C	C	T	T	C	C	A	C
3968	2018	702475740003771	Orphan	East-African-Indian	Orphan	Omani	Sharqiyah	INHR	Sensitive	Resistant	Sensitive	Sensitive	Sensitive	A	G	G	C	C	A	G	G	A	G	G	A	C	C	C	C	G	A	C	C	C	C	A	C	A	T	T	G	C	C	T	T	C	C	A	C
4085	2018	637765777760730	Orphan	Euro-American	Orphan	Expatriate	Batinah	Sensitive	Sensitive	Sensitive	Sensitive	Sensitive	Sensitive	A	G	G	C	C	A	G	G	A	G	G	A	C	C	C	C	G	A	C	C	G	C	A	C	A	T	T	G	C	C	T	T	C	C	A	C
4088	2018					Expatriate	Sharqiyah	Sensitive	Sensitive	Sensitive	Sensitive	Sensitive	Sensitive	A	G	G	C	C	A	G	G	A	G	G	A	C	C	C	C	G	A	C	C	G	C	A	C	A	T	T	T	C	C	T	T	C	C	A	C
4148	2018					Expatriate	Muscat	Sensitive	Sensitive	Sensitive	Sensitive	Sensitive	Sensitive	A	G	G	C	C	A	G	G	A	G	G	A	C	C	C	C	G	A	C	C	G	C	A	C	A	T	T	T	C	C	T	T	C	C	A	C
4190	2018	703707740003771	CAS	East-African-Indian	427	Expatriate	Dhofar	PolyR	Resistant	Resistant	Sensitive	Sensitive	Sensitive	A	G	G	C	C	A	G	G	A	G	G	A	C	C	C	C	G	A	C	C	G	C	A	C	A	T	T	T	C	C	T	T	C	C	A	C
4269	2018	703767740000371	CAS	East-African-Indian	3796	Omani	Sharqiyah	Sensitive	Sensitive	Sensitive	Sensitive	Sensitive	Sensitive												A	C	C	C	C	G	A	C	C	G	C	A	C	A	T	T	T	C	C	T	T	C	C	A	C
4273	2018	777777702003371	EAI	Indo-Oceanic	2152	Omani	Muscat	PZAR	Sensitive	Sensitive	Sensitive	Sensitive	Resistant	A	G	G	C	C	A	G	G	A	G	G	A	C	C	C	C	G	A	C	C	G	C	A	C	A	T	T	T	C	C	T	T	C	C	A
4278	2018	400027777413771	EAI	Indo-Oceanic	2921	Expatriate	Muscat	INHR	Sensitive	Resistant	Sensitive	Sensitive	Sensitive	A	G	G	C	C	A	G	G	C	G	G	A	C	C	C	C	G	A	C	C	G	C	A	C	A	T	T	T	C	C	T	T	C	C	A	C
4306	2018	703767740003171	CAS	East-African-Indian	309	Expatriate	Dhofar	Sensitive	Sensitive	Sensitive	Sensitive	Sensitive	Sensitive	A	G	G	C	C	A	G	G	A	G	G	A	C	C	C	C	G	A	C	C	G	C	A	C	A	T	T	T	C	C	T	T	C	C	A	C
4220	2018	474000377413031	EAI	Indo-Oceanic	1983	Expatriate	Dhahira	Sensitive	Sensitive	Sensitive	Sensitive	Sensitive	Sensitive	A	G	G	C	C	A	G	G	A	G	G	A	C	C	C	C	G	A	C	C	G	C	A	C	A	T	T	T	C	C	T	T	C	C	A
4375	2018	777767607760771	LAM	Euro-American	150	Expatriate	Sharqiyah	Sensitive	Sensitive	Sensitive	Sensitive	Sensitive	Sensitive	A	G	G	C	T	A	G	G	A	G	G	A	C	C	C	C	G	A	C	C	G	C	A	C	A	T	T	G	C	C	T	T	C	C	A	C
3376	2017	000000000003771	Beijing	East-Asian	1	Omani	Dhahira	Sensitive	Sensitive	Sensitive	Sensitive	Sensitive	Sensitive	A	G	G	C	C	A	G	G	A	G	G	A	C	C	C	C	G	A	C	C	G	C	A	C	A	T	T	T	C	C	T	T	C	C	A	C
1474	2017	703767740003171	CAS	East-African-Indian	309	Omani	Dhofar	Sensitive	Sensitive	Sensitive	Sensitive	Sensitive	Sensitive	A	G	G	C	C	A	G	G	A	G	G	A	C	C	C	C	G	A	C	C	G	C	A	C	A	T	T	T	C	C	T	T	C	C	A	C
1476	2017	477777277413771	EAI	Indo-Oceanic	10	Omani	Batinah	Sensitive	Sensitive	Sensitive	Sensitive	Sensitive	Sensitive	A	G	G	C	C	A	G	G	A	G	G	A	C	C	C	C	G	A	C	C	G	C	A	C	A	T	T	T	C	C	T	T	C	C	A	C
1620	2017	777767470060771	Orphan	Euro-American	Orphan	Omani	Buraimi	Sensitive	Sensitive	Sensitive	Sensitive	Sensitive	Sensitive	A	G	G	C	C	A	G	G	A	G	G	A	C	C	C	C	G	A	C	C	G	C	A	C	A	T	T	G	C	C	T	T	C	C	A	C
1649	2017	703767640003771	CAS	East-African-Indian	3792	Omani	Batinah	Sensitive	Sensitive	Sensitive	Sensitive	Sensitive	Sensitive	A	G	G	C	C	A	G	G	A	G	G	A	C	C	C	C	G	A	C	C	G	C	A	C	A	T	T	T	C	C	T	T	C	C	A	C
3630	2017	777767677720771	Orphan	Euro-American	Orphan	Omani	Batinah	SMR	Resistant	Sensitive	Sensitive	Sensitive	Sensitive	A	G	G	C	C	A	G	G	A	G	G	A	C	C	C	C	G	A	C	C	G	C	A	C	A	T	T	T	C	C	T	T	C	C	A	C
3292	2017	776367677760771	S	Euro-American	2135	Omani	Muscat	Sensitive	Sensitive	Sensitive	Sensitive	Sensitive	Sensitive	A	G	G	C	C	A	G	G	A	G	G	A	C	C	C	C	G	A	C	C	G	C	A	C	A	T	T	G	C	C	T	T	C	C	A	C
3525	2017	703765000003771	Orphan	East-African-Indian	Orphan	Expatriate	Dakhliyah	Sensitive	Sensitive	Sensitive	Sensitive	Sensitive	Sensitive	A	G	G	C	C	A	G	G	C	G	G	A	C	C	C	C	G	A	C	C	G	C	A	C	A	T	T	T	C	C	T	T	C	C	A	C
1012	2016	777777774020771	H	Euro-American	47	Omani	Muscat	Sensitive	Sensitive	Sensitive	Sensitive	Sensitive	Sensitive												A	C	C	C	C	G	A	C	C	G															C
1091	2016	703777740003771	CAS	East-African-Indian	26	Omani	Batinah	Sensitive	Sensitive	Sensitive	Sensitive	Sensitive	Sensitive												A	C	C	C	C	G	A	C	C	G	C	A	C	A	T	T	G	C	C	T	T	C	C	A
1190	2016	400037777413771	EAI	Indo-Oceanic	8	Omani	Dhofar	Sensitive	Sensitive	Sensitive	Sensitive	Sensitive	Sensitive												A	C		C	C		A	C	C	G	C	A	C	A	T	T	T	C	C	T	T	C	C	A	C
1425	2016	703777740000771	CAS	East-African-Indian	357	Expatriate	Batinah	Sensitive	Sensitive	Sensitive	Sensitive	Sensitive	Sensitive	A	G	G	C	C	A	G	G	A	G	G	A	C	C	C	C	G	A	C	C	G	C	A	C	A	T	T	T	C	C	T	T	C	C	A	C
1468	2016	477777777020771	H	Euro-American	2907	Expatriate	Dhahira	Sensitive	Sensitive	Sensitive	Sensitive	Sensitive	Sensitive	A	G	G	C	C	A	G	G	A	G	G	A	C	C	C	C	G	A	C	C	G	C	A	C	A	T	T	G	C	C	T	T	C	C	A	C
1721	2016	477777661760771	T	Euro-American	2995	Omani	Muscat	Sensitive	Sensitive	Sensitive	Sensitive	Sensitive	Sensitive	A	G	G	C	C	A	G	G	A	G	G									C	G	C	A	C	A	T	T	G	C	C	T	T	C	C	A	C
1990	2016	777777743760771	Cameroon	Euro-American	61	Expatriate	Batinah	Sensitive	Sensitive	Sensitive	Sensitive	Sensitive	Sensitive	A	G	G	C	C	A	G	G	A	G	G									C	G	C	A	C	A	T	T	G	C	C	T				A	C
4035	2015	703777740003171	CAS	East-African-Indian	25	Omani	Dhofar	Sensitive	Sensitive	Sensitive	Sensitive	Sensitive	Sensitive												A	C	C	C	C	G	A	C	C	G
2216	2015	703777740003771	CAS	East-African-Indian	26	Omani	Muscat	RIFR	Sensitive	Sensitive	Resistant	Sensitive	Sensitive	A	G	G	C	C	A	G	G	A	G	G	A	C	C	C	C	G	A	C	C	G	C	A	C	A	T	T	G	C	C	T	T	C	C	A	C
2429	2015	777703777760771	T	Euro-American	102	Expatriate	Dakhliyah	RIFR	Sensitive	Sensitive	Resistant	Sensitive	Sensitive	A	G	G	C	C	A	G	G	A	G	G	A	C	C	C	C	G	A	C	C	G	C	A	C	A	T	T	G	C	C	T	T	C	C	A	C
2482	2015	477777661760771	T	Euro-American	2995	Omani	Batinah	Sensitive	Sensitive	Sensitive	Sensitive	Sensitive	Sensitive	A	G	G	C	C	A	G	G	A	G	G	A	C	C	C	C	G	A	C	C	G	C	A	C	A	T	T	G	C	C	T	T	C	C	A
3393	2015	703777740003771	CAS	East-African-Indian	26	Omani	Batinah	RIFR	Sensitive	Sensitive	Resistant	Sensitive	Sensitive	A	G	G	C	C	A	G	T	A	G	G	A	C	C	C	C	G	A	C	C	G	C	A	C	A	T	T	G	C	C	T	T	C	C	A
3525	2015	777777774020771	H	Euro-American	47	Omani	Batinah	Sensitive	Sensitive	Sensitive	Sensitive	Sensitive	Sensitive	A	G	G	C	C	A	G	G	A	G	G	A	C	C	C	C	G	A	C	C	G	C	A	C	A	T	T	G	C	C	T	T	C	C	A
3632	2014	703777740003771	CAS	East-African-Indian	26	Omani	Dakhliyah	Sensitive	Sensitive	Sensitive	Sensitive	Sensitive	Sensitive												A	C	C	C	C	G	A	C	C	G	C	A	C	A	T	T	G	C	C	T	T	C	C	A
3637	2014	777777757413371	EAI	Indo-Oceanic	292	Expatriate		Sensitive	Sensitive	Sensitive	Sensitive	Sensitive	Sensitive	A	G	G	C	C	A	G	G	A	G	G	A	C		C	C		A	C	C	G		A	C	A	T		G		C
3638	2014	777777757413371	EAI	Indo-Oceanic	292	Expatriate		Sensitive	Sensitive	Sensitive	Sensitive	Sensitive	Sensitive												A	C	C	C	C	G	A	C	C	G
3645	2014	777761007760771	LAM	Euro-American	766	Omani	Dhofar	Sensitive	Sensitive	Sensitive	Sensitive	Sensitive	Sensitive	A	G	G	C	C	A	G	G	A	G	G
3723	2014	000000007760771	T	Euro-American	4	Omani	Sharqiyah	Sensitive	Sensitive	Sensitive	Sensitive	Sensitive	Sensitive	A	G	G	C	C	A	G	G	A	G	G	A	C	C	C	C	G	A	C	C	G															C
3700	2014	703777600003771	CAS	East-African-Indian	1093	Expatriate	Muscat	Sensitive	Sensitive	Sensitive	Sensitive	Sensitive	Sensitive												A	C	C	C	C	G	A	C	C	G
3734	2014	777777776560771	Orphan	Euro-American	Orphan	Expatriate	Muscat	Sensitive	Sensitive	Sensitive	Sensitive	Sensitive	Sensitive	A	G	G	C	C	A	G	G	A	G	G	A	C	C	C	C	G	A	C	C	G	C	A	C	A	T	T	G	C	C	T	T	C	C	A
3736	2014	703777740003771	CAS	East-African-Indian	26	Expatriate	Wousta	SMR	Resistant	Sensitive	Sensitive	Sensitive	Sensitive	A	G	G	C	C	A	G	G	A	G	G
4064	2014	703777740000771	CAS	East-African-Indian	357	Omani	Muscat	Sensitive	Sensitive	Sensitive	Sensitive	Sensitive	Sensitive	A	G	G	C	C	A	G	G	A	G	G
4880	2014	777767777760601	T	Euro-American	1754	Expatriate	Batinah	RIFR	Sensitive	Sensitive	Resistant	Sensitive	Sensitive	A	G	G	C	C	A	G	G	A	G	G	A	C	C	C	C	G	A	C	C	G	C	A	C	A	T	T	G	C	C	T	T	C	C	A
2351	2017	077767777413731	EAI	Indo-Oceanic	1734	Expatriate	Muscat	INHR	Sensitive	Resistant	Sensitive	Sensitive	Sensitive	A	G	G	C	C	A	A	G	C	G	G	A	C	C	C	C	G	A	C	C	G	C	A	C	A	T	T	T	C	C	T	T	C	C	A	C
2356	2017	677777477413771	EAI	Indo-Oceanic	19	Expatriate	Muscat	Sensitive	Sensitive	Sensitive	Sensitive	Sensitive	Sensitive	A	G	G	C	C	A	G	G	C	G	G	A	C	C	C	C	G	A	C	C	G	C	A	C	A	T	T	T	C	C	T	T	C	C	A	C
2456	2017	703777740003771	CAS	East-African-Indian	26	Expatriate	Muscat	Sensitive	Sensitive	Sensitive	Sensitive	Sensitive	Sensitive	A	G	G	C	C	A	G	G	C	G	G	A	C	C	C	C	G	A	C	C	G	C	A	C	A	T	T	T	C	C	T	T	C	C	A	C
2718	2017	777737777760771	T	Euro-American	37	Omani	Batinah	Sensitive	Sensitive	Sensitive	Sensitive	Sensitive	Sensitive	A	G	G	C	C	A	G	G	A	G	G	A	C	C	C	C	G	A	C	C	G	C	A	C	A	T	T	G	C	C	T	T	C	C	A	C
5129	2017	702777740003771	CAS	East-African-Indian	1092	Expatriate	Batinah	Sensitive	Sensitive	Sensitive	Sensitive	Sensitive	Sensitive	A	G	G	C	C	A	G	G	A	G	G	A	C	C	C	C	G	A	C	C	G	C	A	C	A	T	T	T	C	C	T	T	C	C	A	C
5180	2017	703777740000371	CAS	East-African-Indian	486	Omani	Sharqiyah	Sensitive	Sensitive	Sensitive	Sensitive	Sensitive	Sensitive	A	G	G	C	C	A	G	G	A	G	G	A	C	C	C	C	G	A	C	C	G	C	A	C	A	T	T	T	C	C	T	T	C	C	A	C
5197	2017	400037777413771	EAI	Indo-Oceanic	8	Omani	Muscat	Sensitive	Sensitive	Sensitive	Sensitive	Sensitive	Sensitive	A	G	G	C	C	A	G	G	A	G	G	A	C	C	C	C	G	A	C	C	G	C	A	C	A	T	T	T	C	C	T	T	C	C	A	C
5226	2017	703777740003771	CAS	East-African-Indian	26	Expatriate	Wousta	Sensitive	Sensitive	Sensitive	Sensitive	Sensitive	Sensitive	A	G	G	C	C	A	G	G	A	G	G	A	C	C	C	C	G	A	C	C	G	C	A	C	A	T	T	T	C	C	T	T	C	C	A	C
5235	2017	037637777760771	T	Euro-American	284	Expatriate	Batinah	Sensitive	Sensitive	Sensitive	Sensitive	Sensitive	Sensitive	A	G	G	C	C	A	G	G	A	G	G	A	C	C	C	C	G	A	C	C	G	C	G	C	A	T	T	G	C	C	T	T	C	C	A	C
5253	2017	637775777760730	T	Euro-American	128	Expatriate	Muscat	Sensitive	Sensitive	Sensitive	Sensitive	Sensitive	Sensitive	A	G	G	C	C	A	G	G	A	G	G	A	C	C	C	C	G	A	C	C	G	C	A	C	A	T	T	G	C	C	T	T	C	C	A	C
5322	2017	677777757413371	Orphan	Indo-Oceanic	Orphan	Omani	Sharqiyah	Sensitive	Sensitive	Sensitive	Sensitive	Sensitive	Sensitive	A	G	G	C	C	A	G	G	C	G	G	A	C	C	C	C	G	A	C	C	G	C	A	C	A	T	T	T	C	C	T	T	C	C	A	C
5354	2017	777000003760771	T	Euro-American	365	Expatriate	Buraimi	SMR	Resistant	Sensitive	Sensitive	Sensitive	Sensitive	A	G	G	C	C	A	G	G	A	G	G	A	C	C	C	C	G	A	C	C	G	C	A	C	A	T	T	G	C	C	T	T	C	C	A	C
529	2016	735001777413731	Orphan	Indo-Oceanic	Orphan	Omani	Batinah	Sensitive	Sensitive	Sensitive	Sensitive	Sensitive	Sensitive	A	G	G	C	C	A	G	G	C	G	G	A	C	C	C	C	G	A	C	C	G	C	A	C	A	T	T	T	C	C	T	T	C	C	A	C
2479	2016	000000000003771	Beijing	East-Asian	1	Expatriate	Batinah	SMR	Resistant	Sensitive	Sensitive	Sensitive	Sensitive	A	G	G	C	C	A	G	G	A	G	G	A	C	C	C	C	G	A	C	C	G	C	A	C	A	T	T	T	C	C	T	T	C	C	A	C
2481	2016	577477740003771	Orphan	Indo-Oceanic	Orphan	Expatriate	Batinah	#NULL!					#NULL!	A	G	G	C	C	A	G	G	A	G	G	A	C	C	C	C	G	A	C	C	G	C	A	C	A	T	T	T	C	C	T	T	C	C	A	C
2498	2016	703777740003771	CAS	East-African-Indian	26	Expatriate	Muscat	Sensitive	Sensitive	Sensitive	Sensitive	Sensitive	Sensitive	A	G	G	C	C	A	G	G	A	G	G	A	C	C	C	C	G	A	C	C	G	C	A	C	A	T	T	T	C	T	T	T	C	C	A	C
2557	2016	777777777760731	T	Euro-American	52	Expatriate	Muscat	PolyR	Resistant	Resistant	Sensitive	Sensitive	Sensitive	A	G	G	C	C	A	G	G	A	A	G	A	C	C	C	C	G	A	C	C	G	C	A	C	A	T	T	G	C	C	T	T	C	C	A	C
2649	2016	703777740003771	CAS	East-African-Indian	26	Expatriate	Dhofar	Sensitive	Sensitive	Sensitive	Sensitive	Sensitive	Sensitive	A	G	G	C	C	A	G	G	A	G	G	A	C	C	C	C	G	A	C	C	G	C	A	C	A	T	T	T	C	C	T	T	C	C	A	C
2698	2016	737001777413731	EAI	Indo-Oceanic	3804	Omani	Batinah	Sensitive	Sensitive	Sensitive	Sensitive	Sensitive	Sensitive												A	C	C	C	C	G	A	C	C	G	C	A	C	A	T	T	T	C	C	T	T	C	C	A	C
2828	2016	777777607760771	LAM	Euro-American	42	Expatriate	Batinah	Sensitive	Sensitive	Sensitive	Sensitive	Sensitive	Sensitive	A	G	G	C	C	A	G	G	A	G	G	A	C	C	C	C	G	A	C	C	G	C	A	C	A	T	T	G	C	C	T	T	C	C	A	C
2908	2016	477777777413071	EAI	Indo-Oceanic	11	Expatriate	Muscat	Sensitive	Sensitive	Sensitive	Sensitive	Sensitive	Sensitive	A	G	G	C	C	A	G	G	C	G	G	A	C	C	C	C	G	A	C	C	G	C	A	C	A	T	T	T	C	C	T	T	C	C	A	C
3637	2016	777717777413731	EAI	Indo-Oceanic	3355	Expatriate	Batinah	INHR	Sensitive	Resistant	Sensitive	Sensitive	Sensitive	A	G	G	C	C	A	G	G	C	G	G	A	C	C	C	C	G	A	C	C	C	C	A	C	A	T	T	T	C	C	T	T	C	C	A
3702	2016	777767377760771	Orphan	Euro-American	Orphan	Expatriate	Muscat	Sensitive	Sensitive	Sensitive	Sensitive	Sensitive	Sensitive	A	G	G	C	C	A	G	G	A	G	G	A	C	C	C	C	G	A	C	C	G	C	A	C	A	T	T	T	C	C	T	T	C	C	A	C
1945	2015	400037777413771	EAI	Indo-Oceanic	8	Expatriate	Dhofar	Sensitive	Sensitive	Sensitive	Sensitive	Sensitive	Sensitive	A	G	G	C	C	A	G	G	C	G	G									C	G	C	A	C	A	T	T	G	C	C	T				A	C
1944	2015	703737740003771	CAS	East-African-Indian	1343	Expatriate	Dhofar	Sensitive	Sensitive	Sensitive	Sensitive	Sensitive	Sensitive	A	G	G	C	C	A	G	G	A	G	G	A	C	C	C	C	G	A	C	C	G	C	A	C	A	T	T	T	C	C	T	T	C	C	A	C
2022	2015	777777777760771	T	Euro-American	53	Expatriate	Batinah	Sensitive	Sensitive	Sensitive	Sensitive	Sensitive	Sensitive	A	G	G	C	C	A	G	G	A	G	G	A	C	C	C	C	G	A	C	C	G	C	A	C	A	T	T	G	C	C	T	T	C	C	A	C
2023	2015	474377777413771	EAI	Indo-Oceanic	340	Omani	Batinah	Sensitive	Sensitive	Sensitive	Sensitive	Sensitive	Sensitive	A	G	G	C	C	A	G	G	C	G	G	A	C	C	C	C	G	A	C	C	G	C	A	C	A	T	T	G	C	C	T	T	C	C	A	C
2025	2015	577777777420771	H	Euro-American	127	Expatriate	Batinah	Sensitive	Sensitive	Sensitive	Sensitive	Sensitive	Sensitive	A	G	G	C	C	A	G	G	A	G	G	A	C	C	C	C		A	C	C	G															C
2190	2015	400037777413771	EAI	Indo-Oceanic	8	Omani	Batinah	Sensitive	Sensitive	Sensitive	Sensitive	Sensitive	Sensitive	A	G	G	C	C	A	G	G	C	G	G	A	C	C	C	C	G	A	C	C	G	C	A	C	A	T	T	T	C	C	T	T	C	C	A	C
2159	2015	777777607760771	LAM	Euro-American	42	Expatriate	Muscat	Sensitive	Sensitive	Sensitive	Sensitive	Sensitive	Sensitive	A	G	G	C	C	A	G	G	A	G	G	A	C	C	C	C	G	A	C	C	G	C	A	C	A	T	T	G	C	C	T	T	C	C	A
2166	2015	477777377413771	EAI	Indo-Oceanic	109	Omani	Muscat	Sensitive	Sensitive	Sensitive	Sensitive	Sensitive	Sensitive	A	G	G	C	C	A	G	G	A	G	G	A	C	C	C	C	G	A	C	C	G	C	A	C	A	T	T	T	C	C	T	T	C	C	A	C
2188	2015	777777777760731	T	Euro-American	52	Omani	Dhahira	Sensitive	Sensitive	Sensitive	Sensitive	Sensitive	Sensitive	A	G	G	C	C	A	G	G	A	G	G	A	C	C	C	C	G	A	C	C	G	C	A	C	A	T	T	G	C	C	T	T	C	C	A	C
2212	2015	400037777413771	EAI	Indo-Oceanic	8	Omani	Muscat	Sensitive	Sensitive	Sensitive	Sensitive	Sensitive	Sensitive	A	G	G	C	C	A	G	G	C	G	G	A	C	C	C	C	G	A	C	C	G	C	A	C	A	T	T	T	C	C	T	T	C	C	A	C
2257	2015					Omani	Muscat	Sensitive	Sensitive	Sensitive	Sensitive	Sensitive	Sensitive	A	G	G	C	C	A	G	G	C	G	G	A	C	C	C	C	G	A	C	C	G	C	A	C	A	T	T	T	C	C	T	T	C	C	A	C
2408	2015	000000000003771	Beijing	East-Asian	1	Expatriate	Muscat	Sensitive	Sensitive	Sensitive	Sensitive	Sensitive	Sensitive	A	G	G	C	C	A	G	G	A	G	G	A	C	C	C	C	G	A	C	C	G	C	A	C	A	T	T	T	C	C	T	T	C	C	A	C
2859	2015	703777740003771	CAS	East-African-Indian	26	Expatriate	Muscat	Sensitive	Sensitive	Sensitive	Sensitive	Sensitive	Sensitive	A	G	G	C	C	A	A	G	C	G	G	A	C	C	C	C	G	A	C	C	G	C	A	C	A	T	T	T	C	C	T	T	C	C	A	C
3770	2014	677767477413771	EAI	Indo-Oceanic	1490	Expatriate	Muscat	PolyR	Resistant	Resistant	Sensitive	Sensitive	Sensitive																					C	C					T	T	C	C	T	T	C	C	A	C
4263	2014	471435767413071	Orphan	Indo-Oceanic	Orphan	Expatriate	Dhofar	Sensitive	Sensitive	Sensitive	Sensitive	Sensitive	Sensitive																				C	G	C	A	C	A	T	T	G	C	C	T				A
4358	2014	777767777760601	T	Euro-American	1754	Expatriate	Wousta	MDR	Resistant	Resistant	Resistant	Sensitive	Resistant	G	G	G	C	C	A	G	G	A	G	G	A	C	C	C	C	G	A	C	C	G	C	A	C	A	T	T	G	C	C	T	T	C	C	A	C
4427	2014	777000277760771	Orphan	Euro-American	Orphan	Expatriate	Batinah	Sensitive	Sensitive	Sensitive	Sensitive	Sensitive	Sensitive												A	C	C	C	C	G	A	C	C	G	C	A	C	A	T	T	T	C	C	T	T	C	C	A	C
6647	2014	777777777760771	T	Euro-American	53	Omani	Batinah	Sensitive	Sensitive	Sensitive	Sensitive	Sensitive	Sensitive	A	G	G	C	C	C	G	G	A	G	G	A	C	C	C	C	G	A	C	C	G	C	A	C	A	T	T	G	C	C	T	T	C	C	A	C
6767	2014	417777477413071	Orphan	Indo-Oceanic	Orphan	Expatriate	Muscat	Sensitive	Sensitive	Sensitive	Sensitive	Sensitive	#NULL!	A	G	G	C	C	A	G	G	C	G	G	A	C	C	C	C		A	C	C	G	C	A	C	A	T	T	T	C	C	T				A	C
2386	2017	000000000003771	Beijing	East-Asian	1	Expatriate	Dhahira	Sensitive	Sensitive	Sensitive	Sensitive	Sensitive	Sensitive	A	G	G	C	C	A	G	G	A	G	G	A	C	C	C	C	G	A	C	C	G	C	A	C	A	T	T	T	C	C	T	T	C	C	A	C
17	2016	677777457413771	EAI	Indo-Oceanic	2704	Omani	Muscat	PZAR	Sensitive	Sensitive	Sensitive	Sensitive	Resistant	A	G	G	C	C	A	A	G	C	G	G																									C
291	2016	703777740003771	CAS	East-African-Indian	26	Omani	Dhofar	INHR	Sensitive	Resistant	Sensitive	Sensitive	Sensitive	A	G	G	C	C	A	G	G	A	G	G	A	C	C	C	C	G	A	C	C	G	C	A	C	A	T	T	G	C	C	T	T	C	C	A	C
292	2016	000000000003771	Beijing	East-Asian	1	Omani	Dhofar	XDR	-	-	-	-	Resistant	A	G	G	C	C	A	G	G	A	G	C	A	C	C	C	C	G	A	C	C	C	C	A	C	A	T	T	G	C	C	T	T	C	C	A	C
582	2016	700076777760771	X	Euro-American	92	Omani	Dhahira	PZAR	Sensitive	Sensitive	Sensitive	Sensitive	Resistant	A	G	G	C	C	A	G	G	A	G	G	A	C	C	C	C		A	C	C	G	C	A	A	A	T	T	G	C	C	T				A	C
3013	2016	000000000003771	Beijing	East-Asian	1	Omani	Dhofar	SMR	Resistant	Sensitive	Sensitive	Sensitive	Sensitive	A	G	G	C	C	A	G	G	A	G	G									C	G	C	A	C	A	T	T	G	C	C	T				A	C
3051	2016	000000000003771	Beijing	East-Asian	1	Expatriate	Dhofar	XDR	Resistant	Resistant	Resistant	Resistant	Resistant	G	G	G	C	C	A	G	G	A	G	G	A	C	C	C	C	G	A	C	C	C	C	A	C	A	T	T	G	C	C	T	T	C	C	A	C
3344	2016	677777477413771	EAI	Indo-Oceanic	19	Omani	Muscat	Sensitive	Sensitive	Sensitive	Sensitive	Sensitive	Sensitive	A	G	G	C	C	A	A	G	C	G	G	A	C	C	C	C	G	A	C	C	G	C	A	C	A	T	T	G	C	C	T	T	C	C	A
3452	2016	703777740003771	CAS	East-African-Indian	26	Expatriate	Batinah	SMR	Resistant	Sensitive	Sensitive	Sensitive	Sensitive	A	G	G	C	C	A	G	G	A	G	G	A	C	C	C	C	G	A	C	C	G	C	A	C	A	T	T	G	C	C	T	T	C	C	A	C
3967	2016	477777777413031	EAI	Indo-Oceanic	355	Expatriate	Batinah	PZAR	Sensitive	Sensitive	Sensitive	Sensitive	Resistant	A	G	G	C	C	A	G	G	C	G	G	A	C	C	C	C	G	G	A	C	G	C	A	C	A	T	T	G	C	C	T	T	C	C	A	C
4050	2016	777777770020731	H	Euro-American	316	Expatriate	Muscat	SMR	Resistant	Sensitive	Sensitive	Sensitive	Sensitive	A	G	G	C	C	A	G	G	A	G	G	A	C	C	C	C	G	A	C	C	G	C	A	C	A	T	T	G	C	C	T	T	C	C	A	C
4139	2016	776777702003371	Orphan	Indo-Oceanic	Orphan	Omani	Muscat	SMR	Resistant	Sensitive	Sensitive	Sensitive	Sensitive	A	G	G	C	C	A	G	G	C	G	G	A	C	C	C	C	G	A	C	C	G	C	A	C	A	T	T	G	C	C	T	T	C	C	A	C
4239	2016	677777477413771	EAI	Indo-Oceanic	19	Expatriate	Sharqiyah	PZAR	Sensitive	Sensitive	Sensitive	Sensitive	Resistant	A	G	G	C	C	A	A	G	C	G	G	A	C	C	C	C	G	A	C	C	G	C	A	C	A	T	T	G	C	C	T	T	C	C	A
4335	2016	400037777413771	EAI	Indo-Oceanic	8	Omani	Batinah	PZAR	Sensitive	Sensitive	Sensitive	Sensitive	Resistant	A	G	G	C	C	A	G	G	C	G	G	A	C	C	C	C	G	A	C	C	G	C	A	C	A	T	T	G	C	C	T	T	C	C	A	C
4363	2016	677777477413751	EAI	Indo-Oceanic	287	Omani		PZAR	Sensitive	Sensitive	Sensitive	Sensitive	Resistant	A	G	G	C	C	A	A	G	C	G	G	A	C	C	C	C	G	A	C	C	G	C	A	C	A	T	T	G	C	C	T	T	C	C	A	C
4367	2016	676773777777600	BOV	M. bovis	482	Omani		PZAR	Sensitive	Sensitive	Sensitive	Sensitive	Resistant	A	G	G	C	C	A	G	G	C	G	G	A	C	C	C	C	G	A	C	C	G	C	A	C	A	T	T	G	C	C	T	T	C	C	A	C
4368	2016	703777740003171	CAS	East-African-Indian	25	Omani	Wousta	pre-XDR	Resistant	Resistant	Resistant	Sensitive	Resistant	A	A	G	C	C	A	G	G	A	G	G	A	C		C	C		A	C	C	C	C	A	C	A	T	T	G	C	C	T	T	C	C	A	C
4416	2016	677777477413771	EAI	Indo-Oceanic	19	Expatriate	Batinah	Sensitive	Sensitive	Sensitive	Sensitive	Sensitive	Sensitive	A	G	G	C	C	A	A	G	C	G	G	A	C	C	C	C	G	A	C	C	G															C
4447	2016	703777740003771	CAS	East-African-Indian	26	Expatriate	Dakhliyah	Sensitive	Sensitive	Sensitive	Sensitive	Sensitive	Sensitive	A	G	G	C	C	A	G	G	A	G	G	A	C	C	C	C	G	A	C	C	G	C	A	C	A	T	T	G	C	C	T	T	C	C	A	C
4448	2016	777777767773771	Orphan	Indo-Oceanic	Orphan	Omani	Dakhliyah	#NULL!					#NULL!
4469	2016	777577777003731	EAI	Indo-Oceanic	72	Expatriate	Batinah	PZAR	Sensitive	Sensitive	Sensitive	Sensitive	Resistant	A	G	G	C	C	A	G	G	C	G	G	A	C	C	C	C	G	A	C	C	G	C	A	C	A	T	T	G	C	C	T	T	C	C	A	C
4493	2016	777741007760771	LAM	Euro-American	2191	Expatriate		SMR	Resistant	Sensitive	Sensitive	Sensitive	Sensitive	A	G	G	C	C	A	G	G	A	G	G	A	C	C	C	C	G	A	C	C	G	C	A	C	A	T	T	G	C	C	T	T	C	C	A	C
4586	2016	777777677760771	T	Euro-American	291	Expatriate	Batinah	Sensitive	Sensitive	Sensitive	Sensitive	Sensitive	Sensitive																				C	G	C	A	C	A	T	T	G	C	C	T				A	C
4636	2016	703777400000771	CAS	East-African-Indian	599	Expatriate	Muscat	Sensitive	Sensitive	Sensitive	Sensitive	Sensitive	Sensitive	A	G	G	C	C	A	G	G	A	G	G									C	G	C	A	C	A	T	T	G	C	C	T				A	C
4739, 4743, 4770	2016	777777777760731	T	Euro-American	52	Expatriate	Muscat	Sensitive	Sensitive	Sensitive	Sensitive	Sensitive	Sensitive
4702	2016	677777477413771	EAI	Indo-Oceanic	19	Expatriate	Muscat	Sensitive	Sensitive	Sensitive	Sensitive	Sensitive	Sensitive	A	G	G	C	C	A	A	G	C	G	G	A	C	C	C	C	G	A	C	C	G	C	A	C	A	T	T	G	C	C	T	T	C	C	A	C
4731	2016	737001767413731	Orphan	Indo-Oceanic	Orphan	Omani	Batinah	Sensitive	Sensitive	Sensitive	Sensitive	Sensitive	Sensitive	A	G	G	C	C	A	G	G	A	G	G																									C
4760	2016	000000007760771	T	Euro-American	4	Expatriate	Dakhliyah	Sensitive	Sensitive	Sensitive	Sensitive	Sensitive	Sensitive												A	C	C	C	C	G	A	C	C	G	C	A	C	A	T	T	G	C	C	T	T	C	C	A	C
4936	2016	477777777413771	EAI	Indo-Oceanic	126	Omani	Sharqiyah	Sensitive	Sensitive	Sensitive	Sensitive	Sensitive	Sensitive	A	G	G	C	C	A	G	G	C	G	G	A	C	C	C	C	G	A	C	C	G	C	A	C	A	T	T	G	C	C	T	T	C	C	A	C
4954	2016	777777777760731	T	Euro-American	52	Omani	Batinah	Sensitive	Sensitive	Sensitive	Sensitive	Sensitive	Sensitive	A	G	G	C	C	A	G	G	A	G	G									C	G	C	A	C	A	T	T	G	C	C	T				A	C
4993	2016	777777777760601	T	Euro-American	244	Expatriate	Muscat	Sensitive	Sensitive	Sensitive	Sensitive	Sensitive	Sensitive	A	G	G	C	C	A	G	G	A	G	G	A	C	C	C	C	G	A	C	C	G	C	A	C	A	T	T	G	C	C	T	T	C	C	A	C
5002	2016	777777752403371	Orphan	Indo-Oceanic	Orphan	Expatriate	Dhofar	PZAR	Sensitive	Sensitive	Sensitive	Sensitive	Resistant	A	G	G	C	C	A	G	G	C	G	G	A	C	C	C	C	G	A	C	C	G	C	A	C	A	T	T	G	C	C	T	T	C	C	A	C
5043	2016	677777477413771	EAI	Indo-Oceanic	19	Omani	Batinah	Sensitive	Sensitive	Sensitive	Sensitive	Sensitive	Sensitive	A	G	G	C	C	A	A	G	C	G	G									C	G	C	A	C	A	T	T	G	C	C	T				A	C
5071	2016	477737777413071	EAI	Indo-Oceanic	3803	Omani		PZAR	Sensitive	Sensitive	Sensitive	Sensitive	Resistant	A	G	G	C	C	A	G	G	C	G	G	A	C	C	C	C	G	A	C	T	G	C	A	C	A	T	T	G	C	C	T	T	C	C	A	C
5052	2016	710037777713771	Orphan	Indo-Oceanic	Orphan	Omani	Muscat	PZAR	Sensitive	Sensitive	Sensitive	Sensitive	Resistant
5067	2016	703377400001771	CAS	East-African-Indian	21	Expatriate	Batinah	Sensitive	Sensitive	Sensitive	Sensitive	Sensitive	Sensitive	A	G	G	C	C	A	G	G	A	G	G									C	G	C	A	C	A	T	T	G	C	C	T				A	C
5123	2016	000000000003771	Beijing	East-Asian	1	Expatriate	Wousta	pre-XDR	Resistant	Resistant	Resistant	Sensitive	Resistant	A	G	G	C	C	A	G	G	A	G	G	A	C	C	C	C	G	A	C	C	C	C	A	C	A	T	T	G	C	C	T	T	C	C	A	C
5520	2016	703777740003771	CAS	East-African-Indian	26	Omani	Muscat	Sensitive	Sensitive	Sensitive	Sensitive	Sensitive	Sensitive	A	G	G	C	C	A	G	G	A	G	G									C	G	C	A	C	A	T	T	G	C	C	T				A	C
5194	2016	737777767413731	Orphan	Indo-Oceanic	Orphan	Expatriate	Muscat	Sensitive	Sensitive	Sensitive	Sensitive	Sensitive	Sensitive												A	C	C	C	C	G	A	C	C	G	C	A	C	A	T	T	G	C	C	T	T	C	C	A	C
5225	2016	677777777513771	Orphan	Indo-Oceanic	Orphan	Expatriate	Dhahira	Sensitive	Sensitive	Sensitive	Sensitive	Sensitive	Sensitive	A	G	G	C	C	A	G	G	C	G	G	A	C	C	C	C	G	A	C	C	G	C	A	C	A	T	T	G	C	C	T	T	C	C	A	C
5234	2016	677777477413761	EAI	Indo-Oceanic	1868	Expatriate	Muscat	Sensitive	Sensitive	Sensitive	Sensitive	Sensitive	Sensitive	A	G	G	C	C	A	A	G	C	G	G	A	C	C	C	C	G	A	C	C	G	C	A	C	A	T	T	G	C	C	T	T	C	C	A	C
5637	2016	630037777713761	Orphan	M. Africanum I	Orphan	Omani	Muscat	Sensitive	Sensitive	Sensitive	Sensitive	Sensitive	Sensitive	A	G	G	C	C	A	G	G	C	G	G									C	G	C	A	C	A	T	T	G	C	C	T				A	C
328	2015	703777740003171	CAS	East-African-Indian	25	Omani	Dhofar	XDR	Resistant	Resistant	Resistant	Sensitive	Sensitive	A	G	G	C	C	A	G	G	A	G	G	A	C	C	C	C	G	A	C	C	C	C	A	C	A	T	T	T	C	C	T	T	C	C	A	C
1914	2015	000000000003771	Beijing	East-Asian	1	Expatriate	Muscat	INHR	Sensitive	Resistant	Sensitive	Sensitive	Sensitive	A	G	G	C	C	A	G	G	A	G	G	A	C	C	C	C	G	A	C	C	G	C	A	C	A	T	T	G	C	C	T	T	C	C	A	C
2267	2015	000000000003771	Beijing	East-Asian	1	Omani	Dhofar	XDR	Resistant	Resistant	Resistant	Resistant	Sensitive	A	G	G	C	C	A	G	G	A	G	G	A	C	C	C	C	G	A	C	C	C	C	A	C	A	T	T	T	C	C	T	T	C	C	A	C
2995	2015	477777777413071	EAI	Indo-Oceanic	11	Expatriate	Dakhliyah	INHR	Sensitive	Resistant	Sensitive	Sensitive	Sensitive	A	G	G	C	C	A	G	G	C	G	G	A	C	C	C	C	G	A	C	C	G	C	A	C	A	T	T	G	C	C	T	T	C	C	A	C
5209	2015	477777777413771	EAI	Indo-Oceanic	126	Expatriate	Muscat	PolyR	Sensitive	Resistant	Sensitive	Sensitive	Resistant												A	C	C	C	C	G	A	C	C	G	C	A	C	A	T	T	G	C	C	T	T	T	C	A	C
3141	2014	000000000003771	Beijing	East-Asian	1	Expatriate		pre-XDR	Resistant	Resistant	Resistant	Sensitive	Resistant																					C	C					T	T	C	C	T	T	C	C	A	C
4066	2014					Expatriate	Batinah	Sensitive	Sensitive	Sensitive	Sensitive	Sensitive	Sensitive																						C					T	G	C	C	T	T	C	C	A	C
5352	2014	777000377760771	T	Euro-American	149	Expatriate	Batinah	MDR	Resistant	Resistant	Resistant	Resistant	Resistant												A	C	C	C	C	G	A	C	C	C	C	A	C	A	T	T	T	C	C	T	T	C	C	A
5469	2014	577000377740771	Orphan	Euro-American	Orphan	Expatriate	Sharqiyah	PolyR	Resistant	Resistant	Sensitive	Sensitive	#NULL!																						C					T	G	C	C	T	T	C	C	A	C
6051	2014	777775747413771	EAI	Indo-Oceanic	733	Expatriate	Buraimi	PolyR	Resistant	Resistant	Sensitive	Sensitive	#NULL!	A	G	G	C	C	A	G	G	C	G	G									C	G	C	A	C	A	T	T	T	C	C	T	T	C	C	A	C
4009	2018	777767002003700	Orphan	Indo-Oceanic	Orphan	Omani	Muscat	PZAR	Sensitive	Sensitive	Sensitive	Sensitive	Resistant	A	G	G	C	C	A	G	G	A	G	G	A	C	C	C	C	G	A	C	C	G	C	A	C	A	T	T	G	C	C	T	T	C	C	A
4495	2018	000000000003771	Beijing	East-Asian	1	Expatriate	Sharqiyah	PolyR	Resistant	Resistant	Sensitive	Sensitive	Sensitive												A	C		C	C		A	C	C	C	C	A	C	A	T	T	T	C	C	T	T	C	C	A
4629	2018	777767743760771	Cameroon	Euro-American	115	Expatriate		RIFR	Sensitive	Sensitive	Resistant	Sensitive	Sensitive												A	C	C	C	C		A	C	C	G	C	A	C	A	T	T	G	C	C	T				A
5102	2018	400027777413771	EAI5	Indo-Oceanic	2921	Omani	Batinah	PZAR	Sensitive	Sensitive	Sensitive	Sensitive	Resistant	A	G	G	C	C	A	G	G	C	G	G	A	C	C	C	C	G	A	C	C	G	C	A	C	A	T	T	G	C	C	T	T	C	C	A
5344	2018	703727740003171	CAS1-Delhi	East-African-Indian	3791	Omani	Muscat	MDR	Resistant	Resistant	Resistant	Resistant	Sensitive	A	G	G	C	C	A	G	G	A	G	G									C	G	C	A	C	A	T	T	T	C	C	T				A
5884	2018	777767757413371	Orphan	Indo_Oceanic	Orphan	Expatriate		PZAR	Sensitive	Sensitive	Sensitive	Sensitive	Resistant
6116	2018	777767777412731	Orphan	Indo_Oceanic	Orphan	Expatriate	Muscat	PZAR	Sensitive	Sensitive	Sensitive	Sensitive	Resistant												A	C	C	C	C		A	C	C	G	C	A	C	A	T	T	T	C	C	T				A
6283	2018	577767757413771	Orphan	Indo_Oceanic	Orphan	Expatriate	Batinah	PZAR	Sensitive	Sensitive	Sensitive	Sensitive	Resistant	A	G	G	C	C	A	G	G	A	G	G									C	G	C	A	C	A	T	T	G	C	C	T				A
6403	2018	757767757413371	Orphan	Indo_Oceanic	Orphan	Expatriate	Dhofar	INHR	Sensitive	Resistant	Sensitive	Sensitive	Sensitive	A	G	G	C	C	A	G	G	C	G	G	A	C	C	C	C	G	A	C	C	C	C	A	C	A	T	T	G	C	C	T	T	C	C	A
6646	2018	777767743760771	Cameroon	Euro-American	115	Expatriate	Batinah	SMR	Resistant	Sensitive	Sensitive	Sensitive	Sensitive	A	G	G	C	C	A	G	G	A	G	G	A	C	C	C	C		A	C	C	G	C	A	C	A	T	T	G	C	C	T				A
374	2017	000000000003771	Beijing	East-Asian	1	Expatriate	Sharqiyah	MDR	-	-	-	Sensitive	#NULL!												A	C	C	C	C	G	A	C	C	G	C	A	C	A	T	T	G	C	C	T	T	C	C	A	C
377	2017	000000000003771	Beijing	East-Asian	1	Expatriate	Dhofar	XDR	-	-	-	-	#NULL!	G	G	G	C	C	A	G	G	A	G	G	A	C	C	C	C	G	A	C	C	G	C	A	C	A	T	T	G	C	C	T	T	C	C	A	C
3935	2017	777777606060771	LAM11-ZWE	Euro-American	59	Omani	Sharqiyah	PZAR	Sensitive	Sensitive	Sensitive	Sensitive	Resistant	A	G	G	C	C	A	G	G	A	G	G	A	C	C	C	C	G	A	C	C	G	C	A	C	A	T	T	G	C	C	T	T	C	C	A
4383	2017	557777047413371	EAI	Indo-Oceanic	Indo_Oceanic	Expatriate	Dakhliyah	PZAR	Sensitive	Sensitive	Sensitive	Sensitive	Resistant	A	G	G	C	C	A	G	G	C	G	G	A	C	C	C	C	G	A	C	C	G	C	A	C	A	T	T	G	C	C	T	T	C	C	A
1359	2016	777767702003371	Orphan	Indo_Oceanic	Orphan	Expatriate	Muscat	PZAR	Sensitive	Sensitive	Sensitive	Sensitive	Resistant	A	G	G	C	C	A	G	G	C	G	G	A	C	C	C	C	G	A	C	C	G	C	A	C	A	T	T	T	C	C	T	T	C	C	A
1651	2016	000000007760771	T1-RUS2	Euro-American	4	Expatriate		INHR	Sensitive	Resistant	Sensitive	Sensitive	Sensitive	A	G	G	C	C	A	G	G	A	G	G	A	C	C	C	C	G	A	C	C	C	C	A	C	A	T	T	G	C	C	T	T	C	C	A	C
1806	2016	700367740003771	Orphan	East-African-Indian	Orphan	Expatriate	Batinah	PolyR	Resistant	Resistant	Sensitive	Sensitive	Resistant	A	G	G	C	C	A	G	G	A	G	G	A	C	C	C	C	G	A	C	C	G	C	A	C	A	T	T	T	C	C	T	T	C	C	A
4024	2016					Omani	Batinah	Sensitive	Sensitive	Sensitive	Sensitive	Sensitive	Sensitive	G	G	G	C	C	A	G	G	A	G	G	G	C		C	C		A	C	C	C	C	A	C	A	T	T	G	C	C	T	T	C	C	A
4376	2016	000000000003771	Beijing	East-Asian	1	Omani		SMR	Resistant	Sensitive	Sensitive	Sensitive	Sensitive	A	G	G	C	C	A	G	G	A	G	G	A	C	C	C	C	G	A	C	C	G	C	A	C	A	T	T	T	C	C	T	T	C	C	A
4419	2016	477767777413031	Orphan	Indo_Oceanic	Orphan	Expatriate	Batinah	PZAR	Sensitive	Sensitive	Sensitive	Sensitive	Resistant	A	G	G	C	C	A	G	G	C	G	G	A	C	C	C	C	G	A	C	C	G	C	A	C	A	T	T	T	C	C	T	T	C	C	A
4710	2016	000000000003771	Beijing	East-Asian	1	Expatriate	Muscat	XDR	Resistant	Resistant	Resistant	Resistant	Resistant	A	G	G	C	C	A	G	G	A	G	G	A	C	C	C	C	G	A	C	C	C	C	A	C	A	T	T	T	C	C	T	T	C	C	A
5580	2016	400027777413771	EAI5	Indo-Oceanic	2921	Omani	Batinah	PZAR	Sensitive	Sensitive	Sensitive	Sensitive	Resistant	A	G	G	C	C	A	G	G	A	G	G	A	C	C	C	C	G	A	C	C	G	C	A	C	A	T	T	T	C	C	T	T	C	C	A
5677	2016	777767777413731	EAI1-SOM	Indo-Oceanic	1251	Expatriate	Batinah	PZAR	Sensitive	Sensitive	Sensitive	Sensitive	Resistant												A	C		C	C		A	C	C	G	C	A	C	A	T	T	G	C	C	T	T	C	C	A
2320	2015	677777477413001	Orphan	Indo-Oceanic	Orphan	Expatriate	Sharqiyah	SMR	Resistant	Sensitive	Sensitive	Sensitive	Sensitive	A	G	G	C	C	A	A	G	C	G	G	A	C		C	C		A	C	C	G	C	A	C	A	T	T	T	C	C	T	T	C	C	A
4444	2015	777777777760731	T	Euro-American	1754	Omani		MDR	Resistant	Resistant	Resistant	Sensitive	Resistant	G	G	G	C	C	A	G	G	A	G	G	A	C	C	C	C	G	A	C	C	G	C	A	C	A	T	T	G	C	C	T	T	C	C	A	C
4576	2015	000000000003771	Beijing	East-Asian	1	Expatriate	Batinah	SMR	Resistant	Sensitive	Sensitive	Sensitive	Sensitive	A	G	G	C	C	A	G	G	A	G	G	A	C	C	C	C	G	A	C	C	G	C	A	C	A	T	T	T	C	C	T	T	C	C	A
4715	2015	000000000003771	Beijing	East-Asian	1	Expatriate	Muscat	pre-XDR	Resistant	Resistant	Resistant	Sensitive	Resistant	A	G	G	C	C	A	G	G	A	G	G	A	C	C	C	C	G	A	C	C	C	C	A	C	A	T	T	T	C	C	T	T	C	C	A	C
5104	2015	552767677402771	Orphan	Indo-Oceanic	Orphan	Expatriate	Dhofar	PZAR	Sensitive	Sensitive	Sensitive	Sensitive	Resistant												A	T	C	T	T	G	A	C	C	G	C	A	C	A	T	T	G	C	C	T	T	C	C	A
5595	2015	400037777413771	EAI5	Indo-Oceanic	8	Omani		PZAR	Sensitive	Sensitive	Sensitive	Sensitive	Resistant	A	G	G	C	C	A	G	G	C	G	G	A	C	C	C	C	G	A	C	C	G	C	A	C	A	T	T	T	C	C	T	T	C	C	A
99	2014	703767740003171	CAS1-Delhi	East-African-Indian	309	Omani	Dhofar	pre-XDR	Resistant	Resistant	Resistant	Sensitive	Sensitive												A	C	C	C	C		A	C	C	G
613	2014	477767777413071	EAI3-IND	Indo-Oceanic	298	Expatriate	Muscat	INHR	Sensitive	Resistant	Sensitive	Sensitive	#NULL!
884	2014					Expatriate	Dhofar	SMR	Resistant	Sensitive	Sensitive	Sensitive	#NULL!
1203	2014	777703777760771	T	Euro-American	102	Expatriate	Batinah	SMR	Resistant	Sensitive	Sensitive	Sensitive	#NULL!												A	C	C	C	C		A	C	C	G	C	A	C	A	T	T	G	C	C	T				A
1232	2014	777767607760771	LAM9	Euro-American	150	Expatriate	Muscat	INHR	Sensitive	Resistant	Sensitive	Sensitive	Sensitive																				C	G	C	A	C	A	T	T	G	C	C	T				A
1506	2014	737001777413731	EAI1-SOM	Indo-Oceanic	3804	Omani	Muscat	PZAR	Sensitive	Sensitive	Sensitive	Sensitive	Resistant	A	G	G	C	C	A	G	G	C	G	G	A	C	C	C	C	G	A	C	C	G	C	A	C	A	T	T	G	C	C	T	T	C	C	A
1558	2014	703767740003171	CAS1-Delhi	East-African-Indian	309	Omani	Dakhliyah	RIFR	Sensitive	Sensitive	Resistant	Sensitive	Sensitive	A	G	G	C	C	A	G	G	A	G	G									C	G	C	A	C	A	T	T	G	C	C	T	T	C	C	A
4702	2014	777000377760771	T	Euro-American	149	Omani	Batinah	MDR	Resistant	Resistant	Resistant	Sensitive	Resistant												A	C	C	C	C	G	A	C	C	C	C	A	C	A	T	T	T	C	C	T	T	C	C	A	C
2248	2016					Expatriate	Batinah	INHR	Sensitive	Resistant	Sensitive	Sensitive	Sensitive												A	C	C	C	C	G	A	C	C	C	C	A	C	A	T	T	T	C	C	T	T	C	C	A	C
3383	2017	676763677777600	BOV	M. bovis	695	Omani	Batinah	Sensitive	Sensitive	Sensitive	Sensitive	Sensitive	Sensitive												A	C	C	C	C	G	A	C	C	G	C	A	C	A	T	T	T	A	C	T	T	C	C	A	C
5392	2015	477777777413771	EAI	Indo-Oceanic	126	Omani	Muscat	PolyR	Sensitive	Resistant	Sensitive	Sensitive	Resistant												A	C	C	C	C	G	A	C	C	G	C	A	C	A	T	T	T	C	C	T	T	C	C	A	C
643	2014	477777777413071	EAI	Indo-Oceanic	11	Expatriate	Muscat	PolyR	Resistant	Resistant	Sensitive	Sensitive		A	G	G	C	C	A	G	G	C	G	G	A	C	C	C	C	G	A	C	C	G	C	A	C	A	T	T	T	C	C	T	T	C	C	A	C
3203	2017	477777277413771	EAI	Indo-Oceanic	10	Expatriate	Dhofar	Sensitive	Sensitive	Sensitive	Sensitive	Sensitive	Sensitive												A	C	C	C	C	G	A	C	C	G	C	A	C	A	T	T	T	C	C	T	T	C	C	A	C
2613	2017	600000007413771	Orphan	Indo-Oceanic	Orphan	Omani	Batinah	Sensitive	Sensitive	Sensitive	Sensitive	Sensitive	Sensitive												A	C	C	C	C	G	A	C	C	G	C	A	C	A	T	T	T	C	C	T	T	C	C	A	C
2494	2017	477701737413071	Orphan	Indo-Oceanic	Orphan	Expatriate	Dhofar	Sensitive	Sensitive	Sensitive	Sensitive	Sensitive	Sensitive												A	C	C	C	C	G	A	C	C	G	C	A	C	A	T	T	T	C	C	T	T	C	C	A	C
2493	2017	447777777413771	Orphan	Indo-Oceanic	Orphan	Expatriate	Dhofar	Sensitive	Sensitive	Sensitive	Sensitive	Sensitive	Sensitive												A	C	C	C	C	G	A	C	C	G	C	A	C	A	T	T	T	C	C	T	T	C	C	A	C
2486	2017	000000000003771	Beijing	East-Asian	1	Omani	Dhofar	SMR	Resistant	Sensitive	Sensitive	Sensitive	Sensitive												A	C	C	C	C	G	A	C	C	G	C	A	C	A	T	T	T	C	C	T	T	C	C	A	C
2384	2017	703377400001771	CAS	East-African-Indian	21	Expatriate	Dhofar	Sensitive	Sensitive	Sensitive	Sensitive	Sensitive	Sensitive	A	G	G	C	C	A	G	G	A	G	G	A	C	C	C	C	G	A	C	C	G	C	A	C	A	T	T	T	C	C	T	T	C	C	A	C
2383	2017	000000000003771	Beijing	East-Asian	1	Expatriate	Batinah	Sensitive	Sensitive	Sensitive	Sensitive	Sensitive	Sensitive												A	C	C	C	C	G	A	C	C	G	C	A	C	A	T	T	T	C	C	T	T	C	C	A	C
3203	2017	477777277413771	EAI	Indo-Oceanic	10	Expatriate	Dhofar	Sensitive	Sensitive	Sensitive	Sensitive	Sensitive	Sensitive												A	C	C	C	C	G	A	C	C	G	C	A	C	A	T	T	T	C	C	T	T	C	C	A	C
2109	2017	400037777413771	EAI	Indo-Oceanic	8	Omani	Muscat	Sensitive	Sensitive	Sensitive	Sensitive	Sensitive	Sensitive	A	G	G	C	C	A	G	G	A	G	G	A	C	C	C	C	G	A	C	C	G	C	A	C	A	T	T	T	C	C	T	T	C	C	A	C
3494	2016					Expatriate	Muscat	Sensitive	Sensitive	Sensitive	Sensitive	Sensitive	Sensitive												A	C	C	C	C	G	A	C	C	G	C	A	C	A	T	T	T	C	C	T	T	C	C	A	C
1797	2016	000000000003771	Beijing	East-Asian	1	Omani	Sharqiyah	PolyR	Resistant	Resistant	Sensitive	Sensitive	Sensitive												A	C	C	C	C	G	A	C	C	G	C	A	C	A	T	T	T	C	C	T	T	C	C	A	C
2164	2016					Omani	Muscat	Sensitive	Sensitive	Sensitive	Sensitive	Sensitive	Sensitive												A	C	C	C	C	G	A	C	C	G	C	A	C	A	T	T	G	C	C	T	T	C	C	A	C
2974	2017	703777740003771	CAS	East-African-Indian	26	Expatriate	Dhahira	Sensitive	Sensitive	Sensitive	Sensitive	Sensitive	Sensitive												A	C	C	C	C	G	A	C	C	G	C	A	C	A	T	T	G	C	C	T	T	C	C	A	C
2250	2017	777777774020771	H	Euro-American	47	Expatriate	Wousta	Sensitive	Sensitive	Sensitive	Sensitive	Sensitive	Sensitive												A	C	C	C	C	G	A	C	C	G	C	A	C	A	T	T	G	C	C	T	T	C	C	A	C
2312	2017	677777477413771	EAI	Indo-Oceanic	19	Omani	Muscat	Sensitive	Sensitive	Sensitive	Sensitive	Sensitive	Sensitive												A	C	C	C	C	G	A	C	C	G	C	A	C	A	T	T	G	C	C	T	T	C	C	A	C
96	2014	000000000003771	Beijing	East-Asian	1	Omani	Dhofar	pre-XDR					Resistant	A	G	G	C	C	A	G	G	A	G	G	A	C	C	C	C	G	A	C	C	G	C	A	C	A	T	T	T	C	C	T	T	C	C	A	C
3007	2014					Expatriate	Dhofar	PZAR	Sensitive	Sensitive	Sensitive	Sensitive	Resistant												A	C	C	C	C	G	A	C	C	G	C	A	C	A	T	T	G	C	C	T	T	C	C	A	C
3285	2017	000000000003771	Beijing	East-Asian	1	Expatriate	Muscat	Sensitive	Sensitive	Sensitive	Sensitive	Sensitive	Sensitive	A	G	G	C	C	A	G	G	A	G	G	A	C	C	C	C	G	A	C	C	G															C
3804	2017	776727777760771	Orphan	Euro-American	Orphan	Omani	Batinah	Sensitive	Sensitive	Sensitive	Sensitive	Sensitive	Sensitive												A	C	C	C	C	G	A	C	C	G	C	A	C	A	T	T	G	C	C	T	T	C	C	A	C
3397	2017	676773777777600	BOV	M. bovis	482	Omani		PZAR	Sensitive	Sensitive	Sensitive	Sensitive	Resistant	A	G	G	C	C	A	G	G	C	G	G	A	C	C	C	C	G	A	C	C	G	C	A	C	A	T	T	T	C	C	T	T	C	C	A	C
3523, 3524	2015					Omani	Batinah	Sensitive	Sensitive	Sensitive	Sensitive	Sensitive	Sensitive												A	C	C	C	C	G	A	C	C	G	C	A	C	A	T	T	T	C	C	T	T	C	C	A
[truncated: 45 more columns]
