# Supplementary material for: Drug resistant Mycobacterium tuberculosis in Oman: resistance-conferring mutations and lineage diversity
Source: PeerJ journal article supplement (doi:10.7717/peerj.13645), 2022-07-28
Supplement: Supplementary_Figure_1_05.05.22.pdf [file Supplementary_Figure_1_05.05.22.pdf]

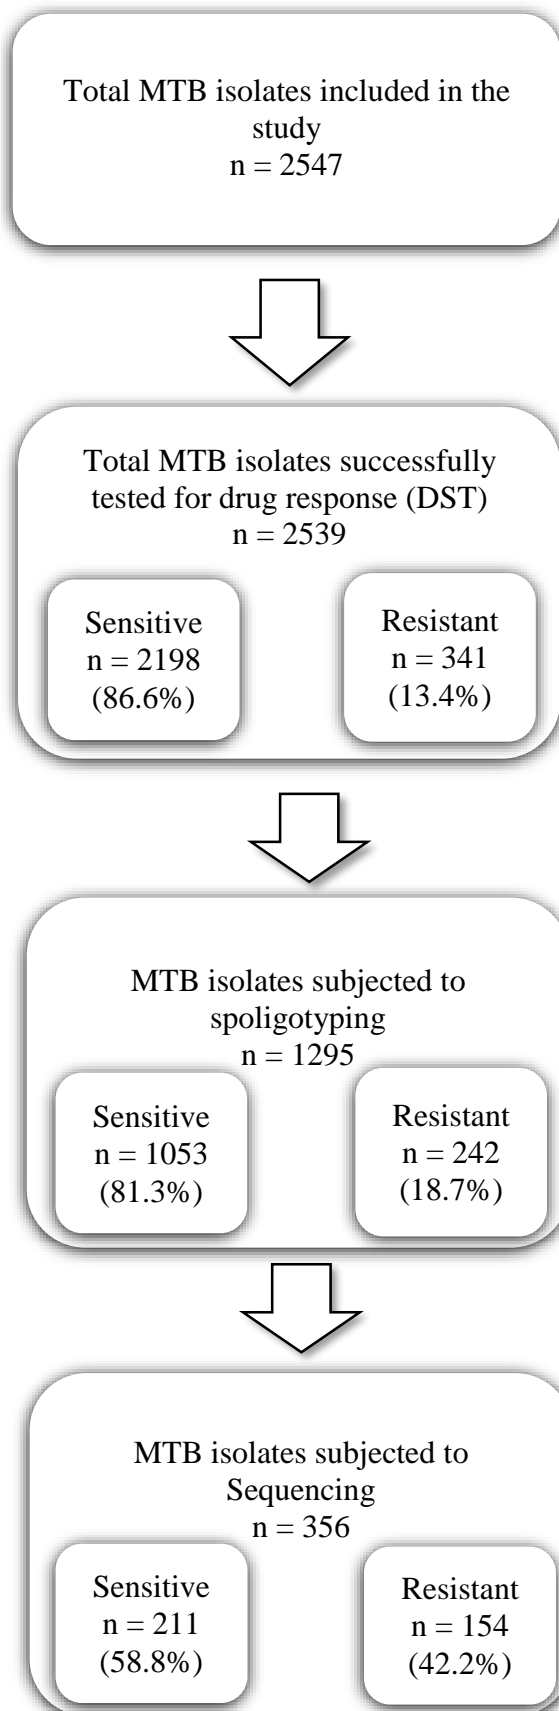

Supplementary Figure 1. Flow chart showing number of MTB isolates successfully analyzed at different stages of the study.
